# Supplementary material for: Bimolecular fusion of [Pd3(μ-CN-C6H3Me2-2,6)3(CN-C6H3Me2-2,6)3] induced by Ph2GeH2: formation of the redox-active Pd6Ge2 complex
Source: Royal Society of Chemistry journal article supplement (doi:10.1039/c9dt00814d), 2019-01-01
Supplement: c9dt00814d1.pdf [file c9dt00814d1.pdf]

Supporting Information

Bimolecular Fusion of  $[\text{Pd}_3(\mu\text{-CN-C}_6\text{H}_3\text{Me}_{2-2,6})_3(\text{CN-C}_6\text{H}_3\text{Me}_{2-2,6})_3]$  Induced by  $\text{Ph}_2\text{GeH}_2$ : Formation of Redox-Active  $\text{Pd}_6\text{Ge}_2$  Complex<sup>†</sup>

Take-aki Koizumi,<sup>1</sup> Kimiya Tanaka,<sup>1</sup> Yoshitaka Tsuchido,<sup>1</sup> Makoto Tanabe,<sup>1</sup> Tomohito Tomohito Ide<sup>2</sup> and Kohtaro Osakada\*<sup>1</sup>

<sup>1</sup> *Laboratory for Chemistry and Life Science, Institute of Innovative Research, Tokyo Institute of Technology, 4259-R1-3 Nagatsuta, Midori-ku, Yokohama 226-8503, Japan*

<sup>2</sup> *Department of Chemistry, National Institute of Technology, Tokyo College, 1220-2 Kunugida-machi, Hachioji-shi, Tokyo, 193-0997, Japan.*

|                                                                                                                                                                                                         |    |
|---------------------------------------------------------------------------------------------------------------------------------------------------------------------------------------------------------|----|
| 1. Experimental Section                                                                                                                                                                                 | 2  |
| 2. X-ray crystallographic details.                                                                                                                                                                      | 4  |
| Table S1. Selected bond lengths (Å) and angles (°) of <b>2</b> .                                                                                                                                        | 4  |
| Table S2. X-ray crystallographic details.                                                                                                                                                               | 5  |
| Figure S1. ORTEP drawing of complex <b>2</b> . Molecule A: (a) Top view, (b) side view, Molecule B: (c) Top view, (d) side view. (e) Atomic numbering of molecule B. (f) Neighboring molecules A and B. | 7  |
| 3. NMR and IR Spectra                                                                                                                                                                                   | 8  |
| Figure S2 <sup>1</sup> H NMR of <b>2</b> .                                                                                                                                                              | 8  |
| Figure S3 <sup>13</sup> C{ <sup>1</sup> H} NMR of <b>2</b> .                                                                                                                                            | 8  |
| Figure S4 <sup>1</sup> H NMR of <b>3</b> .                                                                                                                                                              | 9  |
| Figure S5 <sup>13</sup> C{ <sup>1</sup> H} NMR of <b>3</b> .                                                                                                                                            | 10 |
| Figure S6 1H-1H-COSY NMR spectrum of <b>3</b> .                                                                                                                                                         | 11 |
| Figure S7 IR spectra of <b>2</b> and <b>3</b> .                                                                                                                                                         | 12 |
| 4. Computation                                                                                                                                                                                          | 13 |
| Table S3 The Cartesian coordinate of <b>2</b> .                                                                                                                                                         | 14 |
| Table S4 The Cartesian coordinate of <b>3</b> .                                                                                                                                                         | 21 |
| Figure S8 LUMO of complex <b>2</b> .                                                                                                                                                                    | 28 |
| Figure S9 HOMO of complex <b>2</b> .                                                                                                                                                                    | 28 |
| Figure S10 HOMO-1 of complex <b>2</b> .                                                                                                                                                                 | 29 |
| Figure S11 HOMO-2 of complex <b>2</b> .                                                                                                                                                                 | 29 |
| Figure S12 HOMO-3 of complex <b>2</b> .                                                                                                                                                                 | 30 |
| Figure S13 Natural charge of complex <b>2</b> .                                                                                                                                                         | 30 |
| Figure S14 Wiberg bond index of complex <b>2</b> .                                                                                                                                                      | 31 |
| Figure S15 LUMO of complex <b>3</b> .                                                                                                                                                                   | 32 |
| Figure S16 HOMO of complex <b>3</b> .                                                                                                                                                                   | 32 |
| Figure S17 HOMO-1 of complex <b>3</b> .                                                                                                                                                                 | 33 |
| Figure S18 HOMO-2 of complex <b>3</b> .                                                                                                                                                                 | 33 |
| Figure S19 HOMO-3 of complex <b>3</b> .                                                                                                                                                                 | 34 |
| Figure S20 HOMO-4 of complex <b>3</b> .                                                                                                                                                                 | 34 |
| Figure S22 Natural charge of complex <b>3</b> .                                                                                                                                                         | 35 |
| Figure S22 Wiberg bond index of complex <b>3</b> .                                                                                                                                                      | 35 |
| 5. DFT calculation results and absorption spectra                                                                                                                                                       | 36 |

Figure S23. UV-vis spectra and calculated peak positions.

## 1. Experimental Section

### General considerations

All the procedures for synthesis, purification, and characterization were done under inert gas atmosphere, using Schlenk-type flask and glove-box.  $[\text{Pd}_3(\text{CN}(\text{C}_6\text{H}_4\text{-}2,6\text{-Me}_2))_6]$  [1] and  $[\text{Pd}(\text{dba})_2]$  [2] were prepared according to the literature method. All other commercially available reagents were used as purchased.  $^1\text{H}$ ,  $^{13}\text{C}\{^1\text{H}\}$ , and  $^1\text{H}\text{-}^1\text{H}$  COSY NMR spectra were recorded on a JEOL GX-500 spectrometer. Electrochemical measurements were performed with ALS/chi Electrochemical Analyzer 660A. A conventional three-electrode configuration was used, with glassy carbon working (BAS PFCE carbon electrode) and platinum wire auxiliary electrode (Nilaco special order) and 0.01 M  $\text{AgNO}_3/\text{Ag}$  reference (BAS RE-5). Cyclic voltammograms were recorded at a scan rate of  $100 \text{ mV s}^{-1}$ . Elemental analyses were carried out at the Suzukakedai Materials Analysis Division, Technical Department, Tokyo Institute of Technology.

[1] A. Christofides, *J. Organomet. Chem.*, 1983, **259**, 355-365.

[2] M. F. Rettig, P. M. Maitlis, *Inorg. Synth.*, 1977, **17**, 134-137.

### Synthesis of $[\text{Pd}_6(\text{GePh}_2)(\text{CN}(2,6\text{-dimethylphenyl})_{10})]$ (**2**)

Method A. To a THF (2 mL) solution of  $[\text{Pd}_3(\text{CN}(\text{C}_6\text{H}_4\text{-}2,6\text{-Me}_2))_6]$  (96 mg, 0.087 mmol) was added  $\text{H}_2\text{GePh}_2$  (20 mg, 0.087 mmol) and stirred at rt. After 2 h, diethyl ether (20 mL) was added to the solution, and the solution was cooled at  $-25 \text{ }^\circ\text{C}$ . The solution was removed by cannula filtration and resulting black crystals were dried under the vacuum. Yield: 86 mg (82%).  $^1\text{H}$  NMR (400 MHz,  $[\text{D}_6]$ benzene, RT):  $\delta$  = 8.45 (d, 8H,  $J(\text{H-H}) = 7.0 \text{ Hz}$ ,  $\text{GeC}_6\text{H}_5$  *ortho*), 7.17 (t, 8H,  $J(\text{H-H}) = 7.0 \text{ Hz}$ ,  $\text{GeC}_6\text{H}_5$  *meta*), 7.10 (t, 4H,  $J(\text{H-H}) = 7.0 \text{ Hz}$ ,  $\text{GeC}_6\text{H}_5$  *para*), 6.65-6.28 (m, 16H;  $\text{CNC}_6\text{H}_3(\text{CH}_3)_{2-4,6}$ ), 6.57 (d, 8H  $J(\text{H-H}) = 7.6 \text{ Hz}$ ,  $\text{CNC}_6\text{H}_3(\text{CH}_3)_{2-4,6}$ ), 6.42 (d, 4H  $J(\text{H-H}) = 7.5 \text{ Hz}$ ,  $\text{CNC}_6\text{H}_3(\text{CH}_3)_{2-4,6}$ ), 6.30 (t, 2H  $J(\text{H-H}) = 7.6 \text{ Hz}$ ,  $\text{CNC}_6\text{H}_3(\text{CH}_3)_{2-4,6}$ ), 2.32 (s, 24H;  $\text{CNC}_6\text{H}_3(\text{CH}_3)_{2-4,6}$ ), 1.99 (s, 12H;  $\text{CNC}_6\text{H}_3(\text{CH}_3)_{2-4,6}$ ), 1.92 (s, 24H;  $\text{CNC}_6\text{H}_3(\text{CH}_3)_{2-4,6}$ );  $^{13}\text{C}\{^1\text{H}\}$  NMR (126 MHz,  $[\text{D}_6]$ benzene, RT):  $\delta$  = 172.9 ( $\text{NC}$ ), 166.0 ( $\text{NC}$ ), 162.0 ( $\text{GeC}_6\text{H}_5$  *ipso*), 136.2, 135.7 ( $\text{NC}$ ), 134.8, 133.3, 130.8, 129.3, 129.0, 128.6, 127.5, 127.5, 127.3, 126.9, 126.8, 125.9, 123.2, 19.5 ( $-\text{CH}_3$ ), 18.7 ( $-\text{CH}_3$ ), 18.6 ( $-\text{CH}_3$ ); elemental analysis calcd (%) for  $\text{C}_{114}\text{H}_{110}\text{Ge}_2\text{N}_{10}\text{Pd}_6$ : C 56.96, H 4.61, N 5.83; found: C 56.62, H 5.01, N 5.55. IR (KBr,  $\text{cm}^{-1}$ ): 3036, 2977, 2054, 2033, 1997, 1915, 1586, 1460, 1426, 1380, 1261, 1188, 1164, 1089, 1072, 765, 727, 719, 694, 659. UV-vis (THF, RT):  $\lambda$  (nm) = 445,

559 (sh), 670, 770 (sh).

Method B. To a THF (1mL) solution of Pd(dba)<sub>2</sub> (100 mg, 0.17 mmol) was added 2,6-dimethylphenylisocyanide (48 mg, 0.366 mmol) and stirred at rt. After 5 min., H<sub>2</sub>GePh<sub>2</sub> (11 mg, 0.48 mmol) was added to the solution and stirred at rt for 12 h. Recrystallization from THF/hexane (1:10) and washing with MeCN and diethyl ether gave **2** as black crystals (53 mg, 0.022 mmol, 76%).

Synthesis of [Pd<sub>6</sub>(GePh<sub>2</sub>)(CN(2,6-dimethylphenyl)<sub>8</sub>)(S(C<sub>6</sub>H<sub>4</sub>-4-NO<sub>2</sub>)<sub>2</sub>)] (**3**)

To a THF (1mL) solution of **2** (42 mg, 17 μmol) was added bis(4-nitrophenyl)disulfide (6.0 mg, 20 mmol) and stirred at rt. After 2 h, diethyl ether (20 mL) was added to the solution, and the solution was cooled at -25 °C. The solution was removed by cannula filtration and resulting deep green crystals were dried under the vacuum. Yield: 22 mg (9.1 μmol, 52%). <sup>1</sup>H NMR (500 MHz, [D<sub>6</sub>]benzene, RT): δ = 8.36 (d, 8H; *J*(H-H) = 7.3 Hz, GeC<sub>6</sub>H<sub>5</sub> *ortho*), 7.84 (d, 4H, *J*(H-H) = 8.5 Hz, SC<sub>6</sub>H<sub>4</sub>-NO<sub>2</sub>), 7.30 (d, 4H, *J*(H-H) = 8.5 Hz, SC<sub>6</sub>H<sub>4</sub>-NO<sub>2</sub>), 7.07 (t, 8H; *J*(H-H) = 7.6 Hz, GeC<sub>6</sub>H<sub>5</sub> *meta*), 6.99 (t, 4H; GeC<sub>6</sub>H<sub>5</sub> *para*), 6.79 (t, 4H, *J*(H-H) = 7.6 Hz, CNC<sub>6</sub>H<sub>3</sub>(CH<sub>3</sub>)<sub>2</sub>-4,6 *para*), 6.67 (d, 8H, *J*(H-H) = 7.6 Hz, CNC<sub>6</sub>H<sub>3</sub>(CH<sub>3</sub>)<sub>2</sub>-4,6 *meta*), 6.57 (d, 8H, *J*(H-H) = 7.6 Hz, CNC<sub>6</sub>H<sub>3</sub>(CH<sub>3</sub>)<sub>2</sub>-4,6 *meta*), 2.09 (s, 24H; CNC<sub>6</sub>H<sub>3</sub>(CH<sub>3</sub>)<sub>2</sub>-4,6), 1.93 (s, 24H; CNC<sub>6</sub>H<sub>3</sub>(CH<sub>3</sub>)<sub>2</sub>-4,6), <sup>13</sup>C{<sup>1</sup>H} NMR (126 MHz, [D<sub>6</sub>]benzene, RT): δ = 165.6, 154.1, 152.4, 143.0, 136.0, 134.8, 133.4, 132.3, 129.0, 128.2, 127.3, 127.1, 127.0, 126.8, 126.3, 121.7, 18.8 (-CH<sub>3</sub>), 18.4 (-CH<sub>3</sub>); elemental analysis: Found(%): C 52.70, H 4.23, N 5.48, S 2.33; calcd (%) for C<sub>114</sub>H<sub>110</sub>Ge<sub>2</sub>N<sub>10</sub>Pd<sub>6</sub>: C 52.95, H 4.11, N 5.72, S 2.82. IR (KBr, cm<sup>-1</sup>): 3059, 2921, 2098, 2057, 1995, 1587, 1566, 1496, 1465, 1315, 1183, 1080, 849, 768, 743, 730, 720, 697, 660. UV-vis (THF, RT): λ (nm) = 458 (sh), 640.

## 2. X-ray results

### Crystal structure determination

Crystals for X-ray analyses were obtained as described in the preparations. Suitable crystals were mounted on glass fibers or sealed in thin-walled glass capillaries. Data collection for **2** was performed at -180 °C on a Rigaku/XtaLAB Synergy-DW diffractometer with graphite monochromated Cu K $\alpha$  radiation ( $\lambda = 1.54184 \text{ \AA}$ ). The structure was solved by using the OLEX2 software package [3]. Refinements were performed anisotropically for all non-hydrogen atoms by the full-matrix least-squares method. Hydrogen atoms were placed at the calculated positions and were included in the structure calculation without further refinement of the parameters. The residual electron densities were of no chemical significance. Selected bond lengths of complex **2** are summarized in Table S1. Crystal data and processing parameters are summarized in Table S2.

[3] O. V. Dolomanov, L. J. Bourhis, R. J. Gildea, J. A. K. Howard, H. Puschmann, *J. Appl. Cryst.*, 2009, **42**, 339-341.

**Table S1.** Selected bond lengths (Å) and angles (°) of **2**.

| Molecule A |           | Molecule B |           |
|------------|-----------|------------|-----------|
| Pd1-Pd2    | 2.8053(5) | Pd7-Pd8    | 2.8060(5) |
| Pd1-Pd3    | 2.9434(5) | Pd7-Pd9    | 2.8698(6) |
| Pd1-Pd4    | 2.7570(6) | Pd7-Pd10   | 2.7587(6) |
| Pd1-Pd5    | 2.8797(5) | Pd7-Pd11   | 2.8414(6) |
| Pd1-Pd6    | 2.7929(6) | Pd7-Pd12   | 2.7829(6) |
| Pd2-Pd3    | 2.7239(5) | Pd8-Pd9    | 2.8085(6) |
| Pd2-Pd4    | 3.0369(5) | Pd8-Pd10   | 2.8953(6) |
| Pd2-Pd5    | 2.8053(5) | Pd8-Pd11   | 2.8504(6) |
| Pd2-Pd6    | 2.9333(6) | Pd8-Pd12   | 2.8676(6) |
| Pd3-Pd4    | 2.7049(5) | Pd9-Pd10   | 2.6788(5) |
| Pd5-Pd6    | 2.6962(5) | Pd11-Pd12  | 2.6872(6) |
| Pd1-Ge1    | 2.9687(7) | Pd7-Ge3    | 2.9759(7) |
| Pd1-Ge2    | 2.8328(7) | Pd7-Ge4    | 2.9444(8) |

|            |           |               |           |
|------------|-----------|---------------|-----------|
| Pd2-Ge1    | 2.9281(8) | Pd8-Ge3       | 2.9895(8) |
| Pd2-Ge2    | 3.0859(7) | Pd8-Ge4       | 3.0866(7) |
| Pd3-Ge1    | 2.4629(8) | Pd9-Ge3       | 2.4460(7) |
| Pd4-Ge2    | 2.4631(7) | Pd10-Ge4      | 2.4400(8) |
| Pd5-Ge2    | 2.4375(7) | Pd11-Ge4      | 2.4510(7) |
| Pd6-Ge1    | 2.4545(8) | Pd12-Ge3      | 2.4515(8) |
| Pd1-C25    | 1.993(6)  | Pd7-C139      | 1.972(7)  |
| Pd1-C34    | 1.986(8)  | Pd7-C148      | 1.966(6)  |
| Pd2-C52    | 1.975(6)  | Pd8-C157      | 1.972(7)  |
| Pd2-C9FA   | 1.966(6)  | Pd8-C166      | 1.979(7)  |
| Pd3-C61    | 2.137(6)  | Pd9-C175      | 2.098(6)  |
| Pd3-C70    | 1.959(6)  | Pd9-C184      | 1.949(6)  |
| Pd4-C61    | 2.118(6)  | Pd10-C175     | 2.124(6)  |
| Pd4-C79    | 1.957(6)  | Pd10-C193     | 1.944(6)  |
| Pd5-C88    | 2.128(6)  | Pd11-C202     | 2.101(6)  |
| Pd5-C97    | 1.962(6)  | P11-C211      | 1.931(6)  |
| Pd6-C88    | 2.096(6)  | Pd12-C202     | 2.121(6)  |
| Pd6-C106   | 1.959(6)  | Pd12-C220     | 1.951(6)  |
| Ge1-C1     | 1.990(7)  | Ge3-C115      | 1.996(6)  |
| Ge1-C7     | 2.010(6)  | Ge3-C121      | 1.990(6)  |
| Ge2-C13    | 2.002(5)  | Ge4-C127      | 1.993(6)  |
| Ge2-C19    | 1.992(6)  | Ge4-C133      | 2.012(6)  |
| C61-N5-C62 | 163.5(6)  | C175-N15-C176 | 149.5(6)  |
| C88-N8-C89 | 160.5(7)  | C202-N18-C203 | 150.3(6)  |

**Table S2.** X-ray crystallographic details.

|                   |                                                                                     |
|-------------------|-------------------------------------------------------------------------------------|
| Compound          | Complex <b>2</b>                                                                    |
| Empirical formula | C <sub>238</sub> H <sub>240</sub> Ge <sub>4</sub> N <sub>20</sub> OPd <sub>12</sub> |
| Formula weight    | 4963.62                                                                             |
| Crystal system    | triclinic                                                                           |
| Space group       | <i>P</i> 1 (No. 1)                                                                  |

|                                                     |              |
|-----------------------------------------------------|--------------|
| $a/\text{\AA}$                                      | 15.27410(10) |
| $b/\text{\AA}$                                      | 16.00210(10) |
| $c/\text{\AA}$                                      | 26.7383(3)   |
| $\alpha/^\circ$                                     | 83.0180(10)  |
| $\beta/^\circ$                                      | 74.7000(10)  |
| $\gamma/^\circ$                                     | 62.5470(10)  |
| Volume/ $\text{\AA}^3$                              | 5593.82(10)  |
| $Z$                                                 | 1            |
| $D_{\text{calc}} \text{ g/cm}^3$                    | 1.473        |
| $\mu/\text{mm}^{-1}$                                | 8.589        |
| $F(000)$                                            | 2496.0       |
| Reflections collected                               | 69463        |
| Data/restraints/parameters                          | 32657/3/2538 |
| $R$ [all data]                                      | 0.0287       |
| $R_1$ [ $I > 2\sigma(I)$ ]                          | 0.0278       |
| $wR_2$ [all data]                                   | 0.0705       |
| GOF on $F^2$                                        | 1.057        |
| $\rho_{\text{max}}/\text{hole} / \text{e \AA}^{-3}$ | 0.68/-0.79   |

Disordered solvent molecules were removed by SQUEEZE program and the result was attached to the CIF file.<sup>1-6</sup>

1. Rigaku CrystalStructure, Version 4.2 (2015).
2. Rigaku REQAB (1998).
3. Sheldrick, G. M. A short history of *SHELX*. *Acta Cryst. A* **64**, 112-122 (2008).
4. Sheldrick, G. M. SHELXT: Integrating space group determination and structure solution. *Acta Cryst. A* **70**, C1437 (2014).
5. Vandersluis, P. & Spek, L. A. BYPASS: an effective method for the refinement of crystal structures containing disordered solvent regions. *Acta Cryst. D* **65**, 148-155 (2009).
6. Spek, A. L. Structure validation in chemical crystallography. *Acta Cryst. D* **65**, 148-155 (2009).

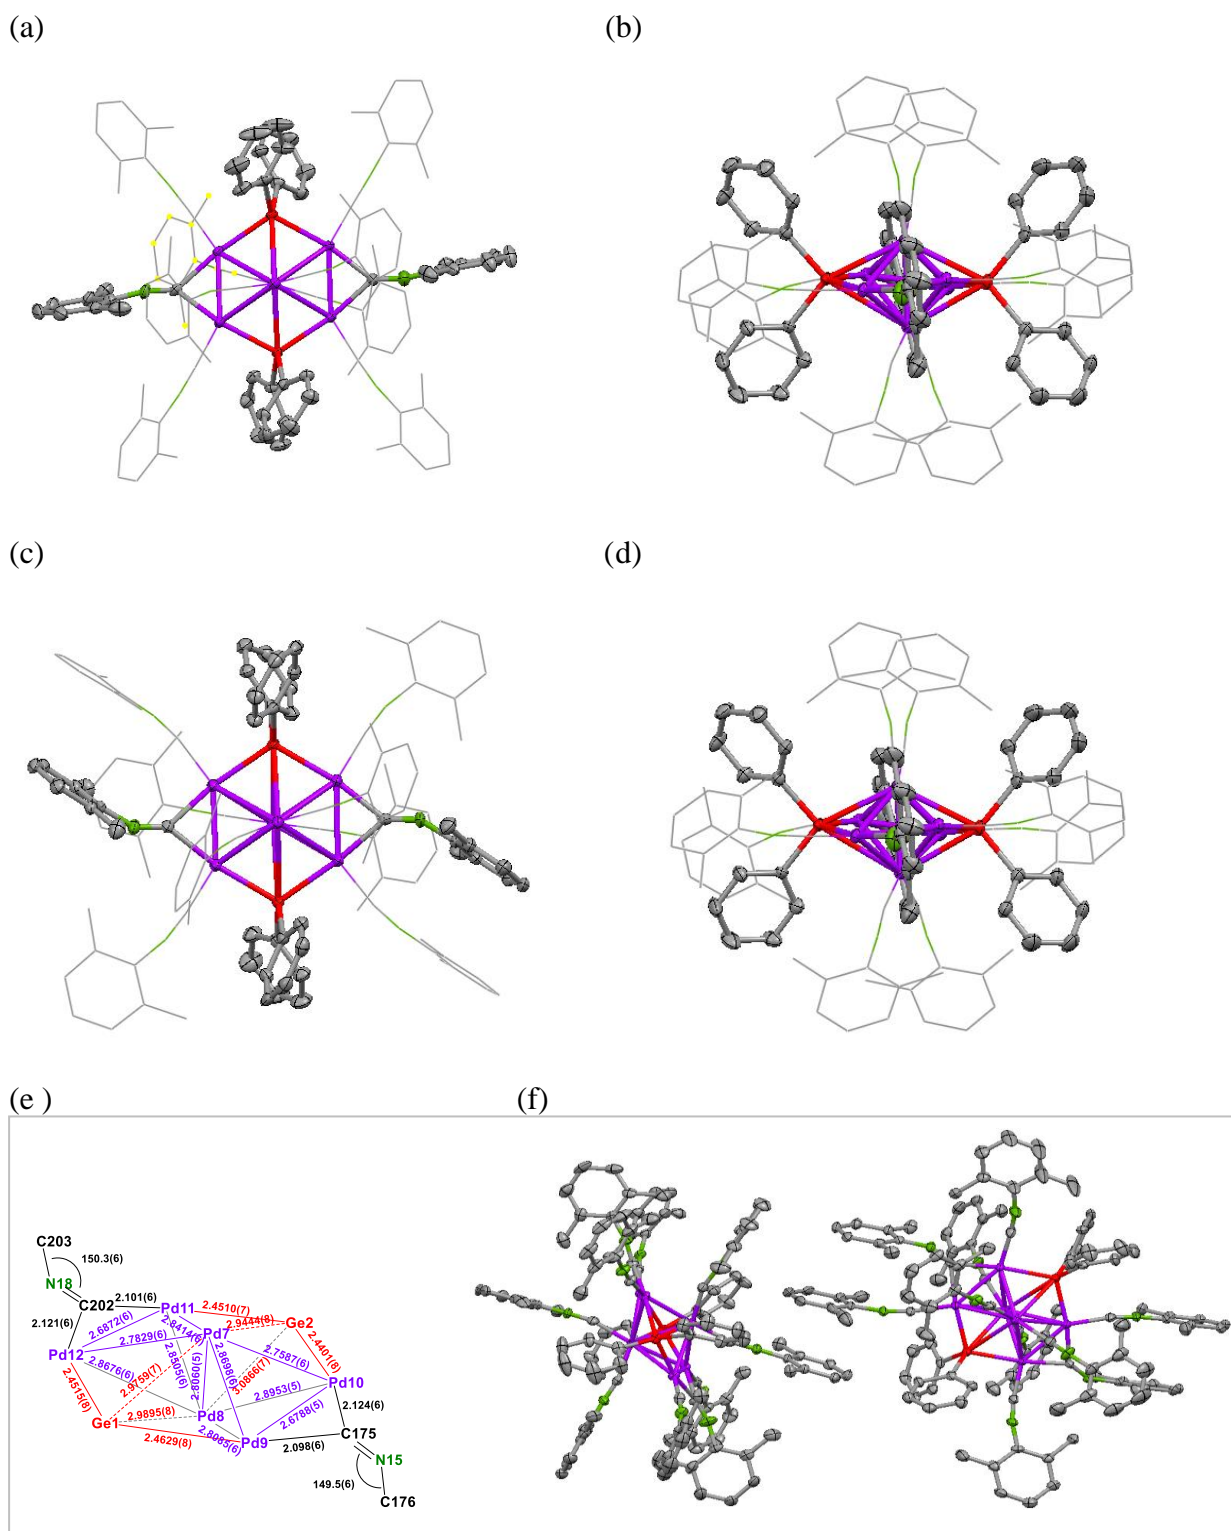

**Figure S1.** ORTEP drawing of complex 2. Molecule A: (a) Top view, (b) side view, Molecule B: (c) Top view, (d) side view. (e) Atomic numbering of molecule B. (f) Packing of the molecules.

### 3. NMR spectra

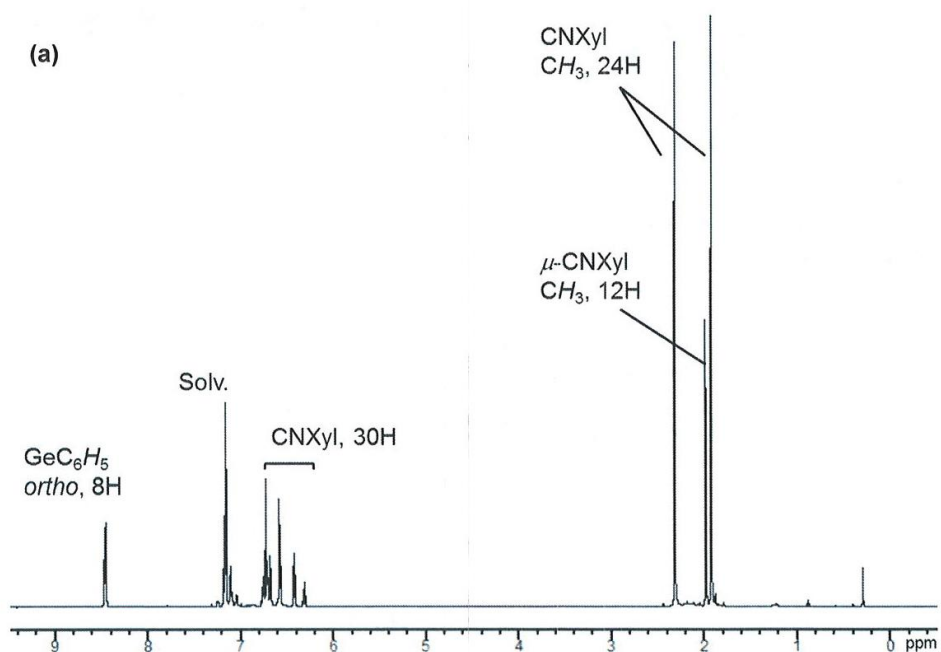

**Figure S2.** <sup>1</sup>H-NMR spectrum of **2** in C<sub>6</sub>D<sub>6</sub>.

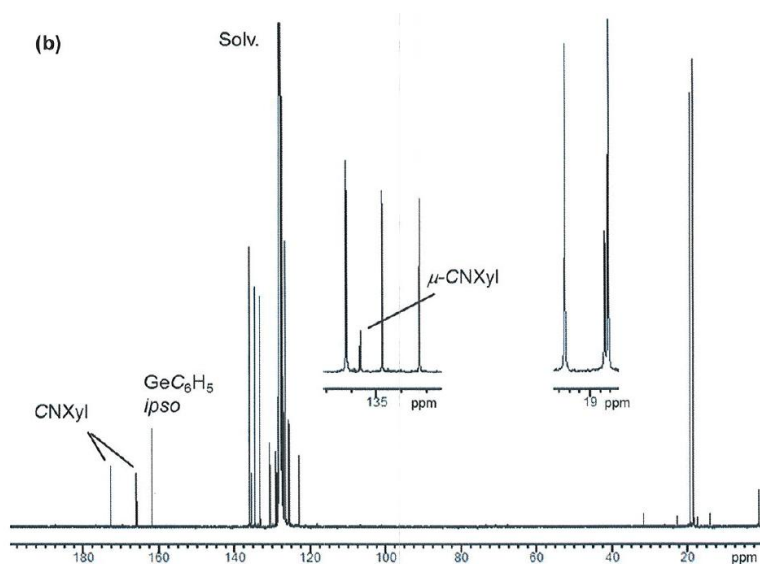

**Figure S3.** <sup>13</sup>C{<sup>1</sup>H}-NMR spectrum of **2** in C<sub>6</sub>D<sub>6</sub>.



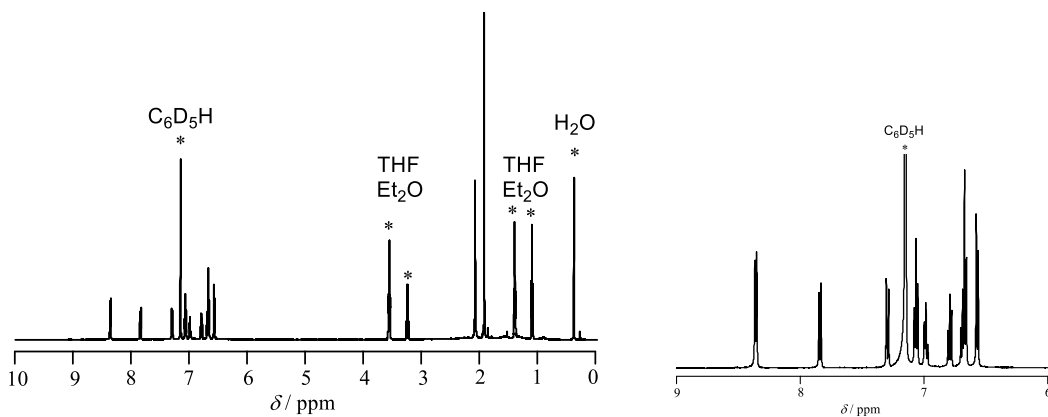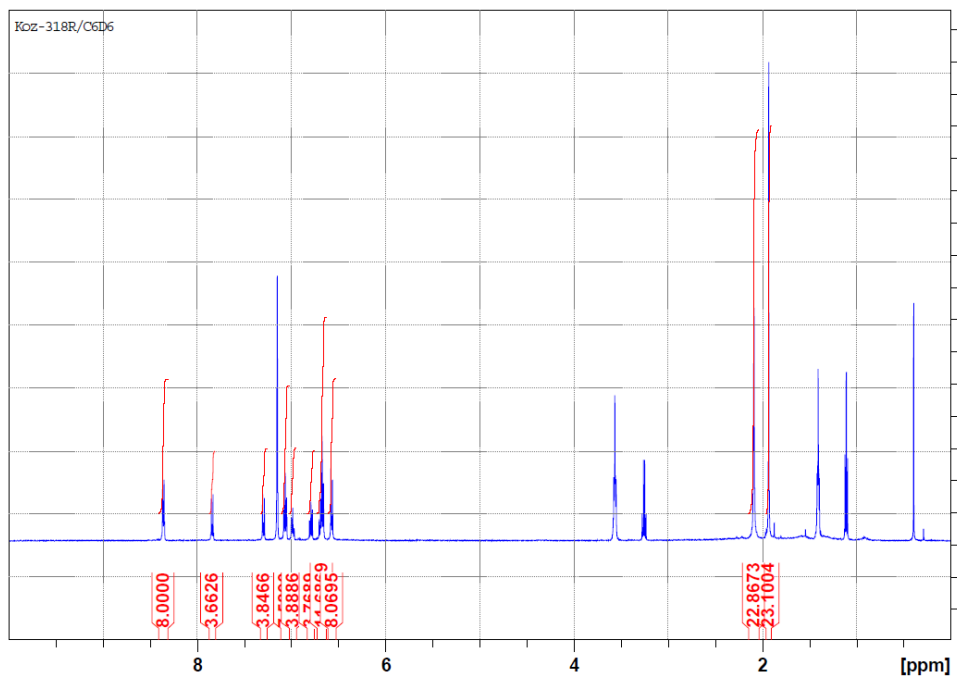

**Figure S4**  $^1\text{H-NMR}$  spectrum of **3** with the original spectrum with data of signal integration (in  $\text{C}_6\text{D}_6$ ).

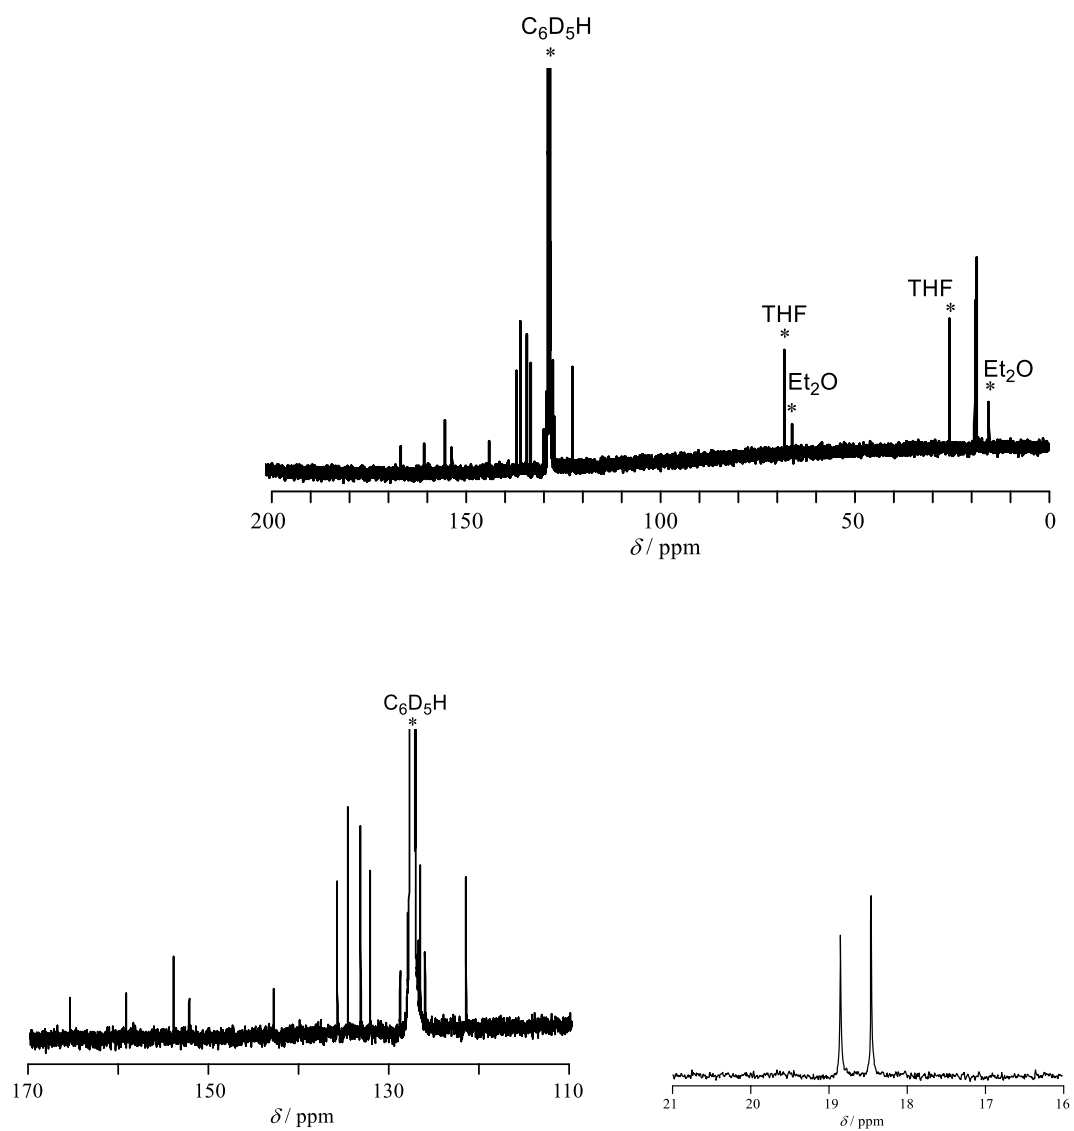

**Figure S5.**  $^{13}\text{C}\{^1\text{H}\}$ -NMR spectrum of **3** in  $\text{C}_6\text{D}_6$ .

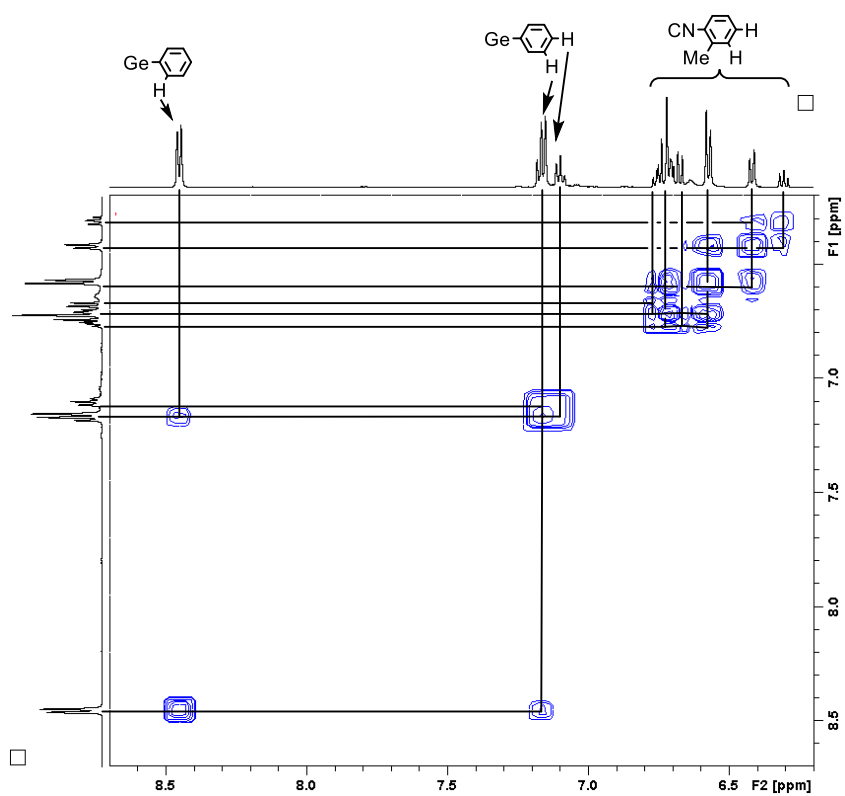

**Figure S6.**  $^1\text{H}$ - $^1\text{H}$  COSY spectrum of **3** in  $\text{C}_6\text{D}_6$ .

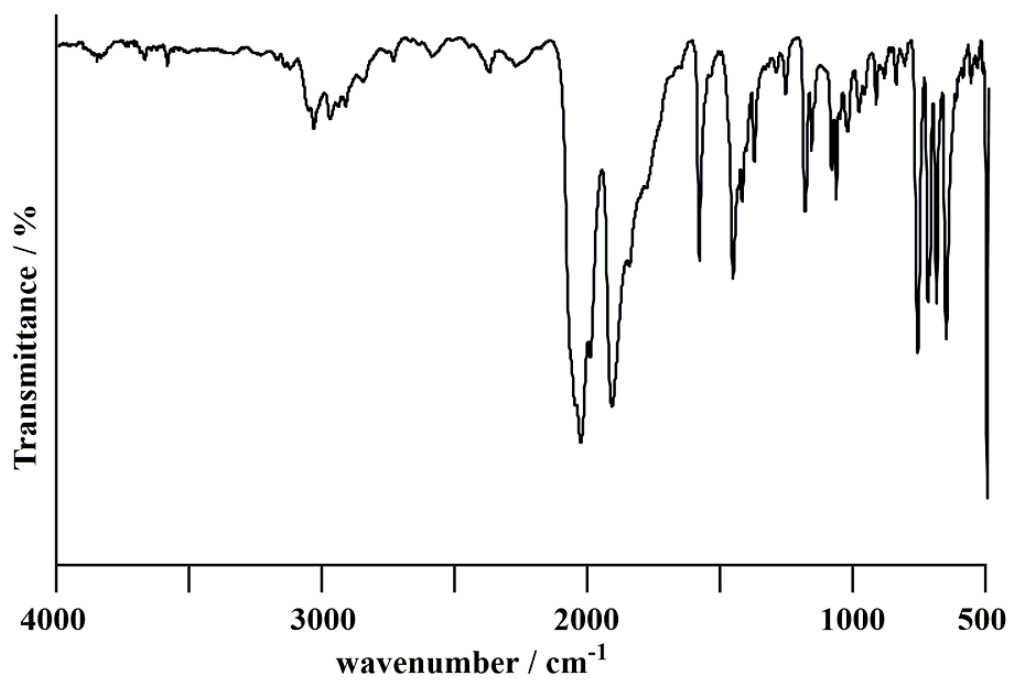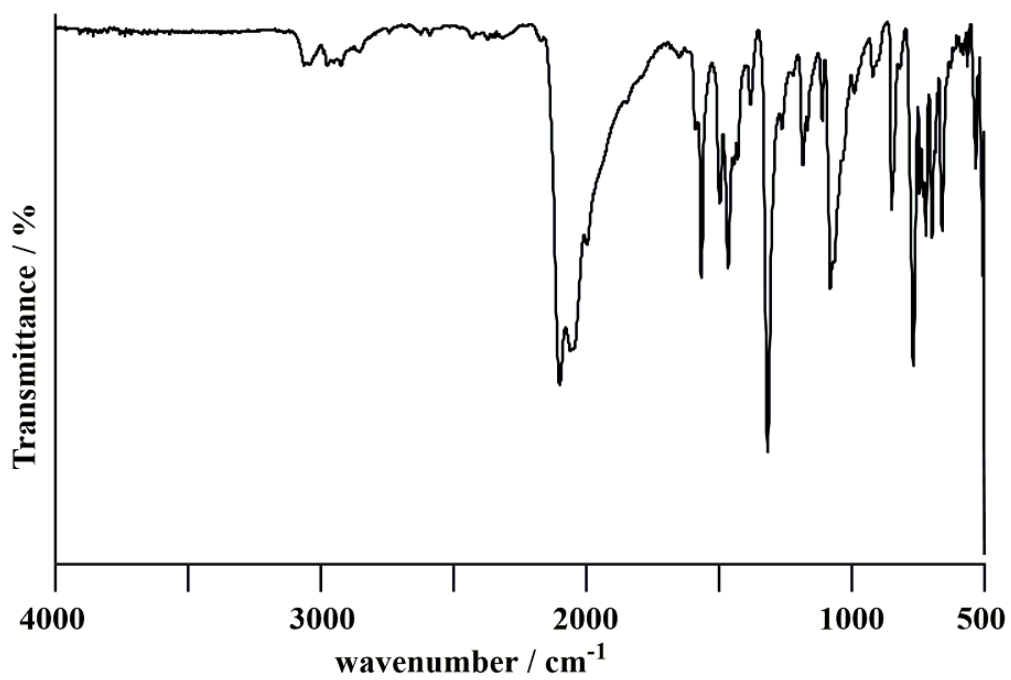

**Figure S7.** IR spectra of **2** (upper) and **3** (lower) in KBr disks.

## 4. Computation

### Computational Details

The geometries of **2** and **3** were optimized by the PBE-D3(BJ)<sup>[S1][S2]</sup> functional in conjunction with the def2-SV(P)<sup>[S3]</sup> basis set and effective core potential (for Pd). Vibrational frequency analyses were carried out to confirm the stationary point at the same level of theory. The density fitting approximation<sup>[S4]</sup> was applied for geometry optimization and frequency calculations in combination with the W06<sup>[S5]</sup> auxiliary basis set. Those calculations were carried out with the Gaussian 16, Revision B.01 package.<sup>[S6]</sup> The natural bond orbital analysis was performed based on wave function obtained from the single point calculation by the  $\omega$ B97X-D3<sup>[S7]</sup> functional with the def2-TZVP<sup>[S3]</sup> basis set and effective core potential (for Pd) using NBO 7.0 program.<sup>[S8]</sup> Single point calculation at the  $\omega$ B97X-D3/def2-TZVP level of theory was carried out with ORCA 4.1.0 package.<sup>[S9]</sup> The RIJCOSX approximation<sup>[S10]</sup> was applied for single point calculation in combination with the def2/J<sup>[S5]</sup> auxiliary basis set. Molecular orbitals (Kohn–Sham (KS) orbitals) were obtained at the  $\omega$ B97X-D3/def2-TZVP level of theory. The orbitals were visualized by VESTA program.<sup>[S11]</sup>

[S1] J. P. Perdew, K. Burke, and M. Ernzerhof, *Phys. Rev. Lett.* **1996**, *77*, 3865–3868.

[S2] S. Grimme, S. Ehrlich, L. Goerigk, *J Comput. Chem.* **2011**, *32*, 1456–1465.

[S3] F. Weigend, R. Ahlrichs, *Phys. Chem. Chem. Phys.* **2005**, *7*, 3297–3305.

[S4] B. I. Dunlap, *J. Mol. Struct. (Theochem)* **2000**, *529*, 37–40.

[S5] F. Weigend, *Phys. Chem. Chem. Phys.* **2006**, *8*, 1057–1065.

[S6] Gaussian 16, Revision B.01, M. J. Frisch, G. W. Trucks, H. B. Schlegel, G. E. Scuseria, M. A. Robb, J. R. Cheeseman, G. Scalmani, V. Barone, G. A. Petersson, H. Nakatsuji, X. Li, M. Caricato, A. V. Marenich, J. Bloino, B. G. Janesko, R. Gomperts, B. Mennucci, H. P. Hratchian, J. V. Ortiz, A. F. Izmaylov, J. L. Sonnenberg, D. Williams-Young, F. Ding, F. Lipparini, F. Egidi, J. Goings, B. Peng, A. Petrone, T. Henderson, D. Ranasinghe, V. G. Zakrzewski, J. Gao, N. Rega, G. Zheng, W. Liang, M. Hada, M. Ehara, K. Toyota, R. Fukuda, J. Hasegawa, M. Ishida, T. Nakajima, Y. Honda, O. Kitao, H. Nakai, T. Vreven, K. Throssell, J. A. Montgomery, Jr., J. E. Peralta, F. Ogliaro, M. J. Bearpark, J. J. Heyd, E. N. Brothers, K. N. Kudin, V. N. Staroverov, T. A. Keith, R. Kobayashi, J. Normand, K. Raghavachari, A. P. Rendell, J. C. Burant, S. S. Iyengar, J. Tomasi, M. Cossi, J. M. Millam, M. Klene, C. Adamo, R. Cammi, J. W. Ochterski, R. L. Martin, K. Morokuma, O. Farkas, J. B. Foresman, D. J. Fox, Gaussian, Inc., Wallingford CT, 2016.

[S7] Y. Lin, G. Li, S. Mao, J. Chai, *J. Chem. Theory Comput.* **2013**, *9*, 263–272.

[S8] NBO 7.0. E. D. Glendening, J. K. Badenhoop, A. E. Reed, J. E. Carpenter, J. A. Bohmann, C. M. Morales, P. Karafiloglou, C. R. Landis, and F. Weinhold, Theoretical Chemistry Institute, University of Wisconsin, Madison WI, 2018.

[S9] F. Neese, *WIREs Comput. Mol. Sci.* **2018**, *8*, e1327.

[S10] F. Neese, F. Wennmohs, A. Hansen, U. Becker, *Chem. Phys.* **2009**, *356*, 98–109.

[S11] K. Momma, F. Izumi, *J. Appl. Crystallogr.* **2011**, *44*, 1272–1276.

**Table S3** The Cartesian coordinate of **2**.

|    |              |              |              |
|----|--------------|--------------|--------------|
| Pd | 6.542547785  | 10.178473571 | 9.239610785  |
| Pd | 6.640718000  | 7.750710571  | 10.920104785 |
| Pd | 8.823919000  | 9.307514785  | 10.611919000 |
| Ge | 8.677945000  | 11.821865785 | 10.556540644 |
| N  | 8.250172429  | 8.054823429  | 7.728950571  |
| N  | 5.096422142  | 11.491989571 | 6.814343215  |
| N  | 4.932055571  | 5.177851785  | 11.240715927 |
| N  | 9.389390000  | 6.335848785  | 11.489902000 |
| N  | 11.950188000 | 9.441362429  | 10.638840571 |
| C  | 9.757414429  | 12.539728000 | 9.024544073  |
| C  | 9.541428429  | 12.028083429 | 7.726802858  |
| H  | 8.830032429  | 11.192643215 | 7.593518644  |
| C  | 10.197039429 | 12.571219644 | 6.610544073  |
| H  | 10.016499644 | 12.149820858 | 5.605829858  |
| C  | 11.077566429 | 13.656940644 | 6.768035502  |
| H  | 11.587311429 | 14.090306858 | 5.890297502  |
| C  | 11.291170215 | 14.192548429 | 8.047461502  |
| H  | 11.961963215 | 15.057864429 | 8.183595717  |
| C  | 10.638587215 | 13.633913000 | 9.160589288  |
| H  | 10.816465215 | 14.078338785 | 10.154510502 |
| C  | 9.653178356  | 12.515651785 | 12.161483073 |
| C  | 8.913889927  | 12.967598785 | 13.275488858 |
| H  | 7.813395927  | 12.924288571 | 13.234964429 |
| C  | 9.550074283  | 13.460379000 | 14.426410073 |
| H  | 8.948239068  | 13.813204785 | 15.278620644 |
| C  | 10.954314283 | 13.498605215 | 14.490007502 |
| H  | 11.459641854 | 13.883303215 | 15.391502717 |
| C  | 11.708709712 | 13.027212215 | 13.401647717 |
| H  | 12.811188712 | 13.038005429 | 13.446594146 |
| C  | 11.062600356 | 12.540513000 | 12.251862502 |
| H  | 11.674874571 | 12.175292000 | 11.410986717 |
| C  | 7.864439215  | 8.841049000  | 8.561361571  |

|   |              |              |              |
|---|--------------|--------------|--------------|
| C | 8.914547858  | 7.091816429  | 7.016023571  |
| C | 8.398333644  | 5.765282644  | 6.975144927  |
| C | 7.120324000  | 5.419066644  | 7.688937854  |
| H | 6.988152142  | 4.318697644  | 7.761025781  |
| H | 6.232705429  | 5.831982932  | 7.153959639  |
| H | 7.089950785  | 5.849184785  | 8.716129283  |
| C | 9.125304858  | 4.800824644  | 6.255905142  |
| H | 8.741796644  | 3.768251858  | 6.222477498  |
| C | 10.321128502 | 5.127235644  | 5.596630000  |
| H | 10.875540717 | 4.352117644  | 5.043265215  |
| C | 10.809857502 | 6.441930644  | 5.650354644  |
| H | 11.752914932 | 6.702396644  | 5.140031288  |
| C | 10.124809288 | 7.443923429  | 6.353196429  |
| C | 10.632225502 | 8.857600429  | 6.435343288  |
| H | 9.943949932  | 9.562968644  | 5.913798644  |
| H | 11.637143932 | 8.953484215  | 5.973722146  |
| H | 10.689957644 | 9.212530215  | 7.487362288  |
| C | 5.599622356  | 10.988454571 | 7.774553215  |
| C | 4.475547356  | 12.156792785 | 5.792873429  |
| C | 3.107045356  | 11.878497000 | 5.526511000  |
| C | 2.385814142  | 10.842293785 | 6.342654571  |
| H | 2.813389927  | 9.826427785  | 6.185337142  |
| H | 1.307624142  | 10.803561000 | 6.083542356  |
| H | 2.485893142  | 11.037227142 | 7.432816571  |
| C | 2.487432571  | 12.603939215 | 4.494487000  |
| H | 1.424142571  | 12.411612429 | 4.274247785  |
| C | 3.197473785  | 13.562656429 | 3.753841429  |
| H | 2.690709000  | 14.120819644 | 2.949719429  |
| C | 4.549710785  | 13.815296215 | 4.036935858  |
| H | 5.103380000  | 14.573078215 | 3.457984073  |
| C | 5.217633571  | 13.122011785 | 5.059164644  |
| C | 6.654315571  | 13.386359785 | 5.420878073  |
| H | 7.286099571  | 12.480834571 | 5.265352073  |
| H | 6.760251356  | 13.641986356 | 6.500239288  |
| H | 7.079792785  | 14.214821785 | 4.817847288  |
| C | 5.628009785  | 6.136230785  | 11.087850142 |

|   |              |             |              |
|---|--------------|-------------|--------------|
| C | 4.049451785  | 4.170364785 | 11.536336142 |
| C | 3.937656000  | 3.745543000 | 12.887025142 |
| C | 4.761200215  | 4.414239215 | 13.953095927 |
| H | 4.472546429  | 5.485352215 | 14.050641712 |
| H | 5.847898215  | 4.397394000 | 13.707635712 |
| H | 4.616064429  | 3.925593429 | 14.939511142 |
| C | 3.008212000  | 2.731218000 | 13.173907571 |
| H | 2.902183215  | 2.386076215 | 14.214988571 |
| C | 2.219490000  | 2.166346785 | 12.160331785 |
| H | 1.496109000  | 1.371322785 | 12.405988000 |
| C | 2.341687571  | 2.614473785 | 10.836225785 |
| H | 1.715317571  | 2.173548571 | 10.042182785 |
| C | 3.257117571  | 3.624899785 | 10.491736356 |
| C | 3.391440142  | 4.149007571 | 9.088837356  |
| H | 3.098244712  | 5.221169356 | 9.023672142  |
| H | 2.754251142  | 3.576912356 | 8.381987356  |
| H | 4.445482142  | 4.098832785 | 8.732812142  |
| C | 8.635271000  | 7.237456785 | 11.201533785 |
| C | 10.466547215 | 5.533720215 | 11.740113215 |
| C | 11.410726215 | 5.279881215 | 10.701057215 |
| C | 11.214264000 | 5.875375785 | 9.335163000  |
| H | 10.302190000 | 5.473422785 | 8.843361429  |
| H | 12.076668785 | 5.659972571 | 8.671694785  |
| H | 11.076632215 | 6.976878785 | 9.385634785  |
| C | 12.517722644 | 4.468613644 | 11.006662429 |
| H | 13.260027644 | 4.270969644 | 10.215391429 |
| C | 12.693792858 | 3.924249073 | 12.287266429 |
| H | 13.572618073 | 3.296090502 | 12.504162644 |
| C | 11.747321858 | 4.179915073 | 13.291830429 |
| H | 11.879247073 | 3.750986502 | 14.299734644 |
| C | 10.617567429 | 4.977324644 | 13.041778215 |
| C | 9.592484429  | 5.269996429 | 14.100386215 |
| H | 9.791012644  | 4.697436858 | 15.029429429 |
| H | 8.562873429  | 5.031143000 | 13.745350215 |
| H | 9.585388000  | 6.350995644 | 14.368519000 |
| C | 10.755752000 | 9.425634215 | 10.624003785 |



|    |              |              |              |
|----|--------------|--------------|--------------|
| C  | 13.323719000 | 9.474059215  | 10.673667142 |
| C  | 14.014869000 | 10.259096215 | 9.708767142  |
| C  | 13.254980000 | 11.019576644 | 8.658283571  |
| H  | 12.536097215 | 11.745438644 | 9.100122000  |
| H  | 12.644062785 | 10.338461073 | 8.025849356  |
| H  | 13.943386000 | 11.582568858 | 7.993824571  |
| C  | 15.418237000 | 10.278497571 | 9.772039498  |
| H  | 15.973803000 | 10.881720571 | 9.035013498  |
| C  | 16.112340215 | 9.549945356  | 10.750395283 |
| H  | 17.213465215 | 9.579342712  | 10.781570854 |
| C  | 15.406867215 | 8.779344571  | 11.686890498 |
| H  | 15.952102215 | 8.204821356  | 12.453490283 |
| C  | 14.003067215 | 8.721181000  | 11.672708927 |
| C  | 13.229886215 | 7.894392429  | 12.662873356 |
| H  | 12.689996356 | 7.060249858  | 12.160920571 |
| H  | 12.457130858 | 8.500249858  | 13.182574785 |
| H  | 13.903191429 | 7.451821000  | 13.425433927 |
| Pd | 6.527179785  | 10.484869571 | 12.001441785 |
| Pd | 6.432458000  | 12.912633571 | 10.320948785 |
| Pd | 4.249259000  | 11.359276785 | 10.632579000 |
| Ge | 4.395230000  | 8.844924785  | 10.698301644 |
| N  | 4.829900429  | 12.622309429 | 13.508653571 |
| N  | 7.962957142  | 9.171352571  | 14.433607215 |
| N  | 8.134226571  | 15.488938785 | 9.986550927  |
| N  | 3.683787000  | 14.330941785 | 9.754596000  |
| N  | 1.122990000  | 11.235765429 | 10.598769571 |
| C  | 3.322652429  | 8.130511000  | 12.237191073 |
| C  | 3.538637429  | 8.649050429  | 13.531484858 |
| H  | 4.250033429  | 9.481045215  | 13.661321644 |
| C  | 2.883025429  | 8.109362644  | 14.651190073 |
| H  | 3.067010644  | 8.534209858  | 15.652456858 |
| C  | 2.002498429  | 7.023641644  | 14.500592502 |
| H  | 1.492751429  | 6.593723858  | 15.378330502 |
| C  | 1.785449215  | 6.484585429  | 13.221167502 |
| H  | 1.114657215  | 5.619269429  | 13.088480717 |
| C  | 2.438034215  | 7.036326000  | 12.104592288 |

|   |              |              |              |
|---|--------------|--------------|--------------|
| H | 2.260157215  | 6.588451785  | 11.114118502 |
| C | 3.409657356  | 8.151137785  | 9.100252073  |
| C | 4.142051927  | 7.699189785  | 7.982799858  |
| H | 5.242545927  | 7.739051571  | 8.016431429  |
| C | 3.495527283  | 7.209854000  | 6.835327073  |
| H | 4.093916068  | 6.853579785  | 5.976222644  |
| C | 2.091287283  | 7.175075215  | 6.778623502  |
| H | 1.579065854  | 6.790376215  | 5.880575717  |
| C | 1.343785712  | 7.646468215  | 7.870428717  |
| H | 0.241306712  | 7.639122429  | 7.832377146  |
| C | 2.000235356  | 8.129722000  | 9.016767502  |
| H | 1.391408571  | 8.494946000  | 9.861088717  |
| C | 5.212185215  | 11.829192000 | 12.676241571 |
| C | 4.172419858  | 13.585315429 | 14.221583571 |
| C | 4.685186644  | 14.915295644 | 14.252122927 |
| C | 5.952855000  | 15.261514644 | 13.521093854 |
| H | 6.071237142  | 16.361884644 | 13.431771781 |
| H | 6.847368429  | 14.869279932 | 14.052623639 |
| H | 5.979779785  | 14.817608785 | 12.500796283 |
| C | 3.961663858  | 15.879752644 | 14.974813142 |
| H | 4.341725644  | 16.915771858 | 14.997901498 |
| C | 2.776182502  | 15.553340644 | 15.647877000 |
| H | 2.225217717  | 16.328457644 | 16.204691215 |
| C | 2.287453502  | 14.238645644 | 15.604492644 |
| H | 1.351289932  | 13.978178644 | 16.125158288 |
| C | 2.969053288  | 13.233207429 | 14.898200429 |
| C | 2.465083502  | 11.819530429 | 14.829838288 |
| H | 3.160253932  | 11.117607644 | 15.341039644 |
| H | 1.467059932  | 11.720199215 | 15.305249146 |
| H | 2.393559644  | 11.461157215 | 13.777819288 |
| C | 7.463204356  | 9.674888571  | 13.473396215 |
| C | 8.587280356  | 8.509996785  | 15.458522429 |
| C | 9.955784356  | 8.791736000  | 15.717985000 |
| C | 10.673567142 | 9.824491785  | 14.894946571 |
| H | 10.242544927 | 10.840357785 | 15.045370142 |
| H | 11.751758142 | 9.866672000  | 15.150610356 |

|   |              |              |              |
|---|--------------|--------------|--------------|
| H | 10.573486142 | 9.619218142  | 13.804785571 |
| C | 10.578846571 | 8.069738215  | 16.750006000 |
| H | 11.642138571 | 8.265509429  | 16.966793785 |
| C | 9.872254785  | 7.114467429  | 17.497546429 |
| H | 10.382469000 | 6.559750644  | 18.301666429 |
| C | 8.520015785  | 6.858384215  | 17.221350858 |
| H | 7.969794000  | 6.100602215  | 17.803751073 |
| C | 7.848642571  | 7.544777785  | 16.195679644 |
| C | 6.411959571  | 7.280430785  | 15.840864073 |
| H | 5.780177571  | 8.182511571  | 15.996391073 |
| H | 6.302572356  | 7.017910356  | 14.764951288 |
| H | 5.989928785  | 6.451971785  | 16.447344288 |
| C | 7.441718785  | 14.530559785 | 10.142862142 |
| C | 9.020275785  | 16.496427785 | 9.694378142  |
| C | 9.135522000  | 16.924691000 | 8.343687142  |
| C | 8.315432215  | 16.259433215 | 7.274168927  |
| H | 8.607535429  | 15.188321215 | 7.173183712  |
| H | 7.228732215  | 16.272832000 | 7.516176712  |
| H | 8.464018429  | 16.751521429 | 6.291198142  |
| C | 10.064965000 | 17.939018000 | 8.063698571  |
| H | 10.174444215 | 18.287602215 | 7.022615571  |
| C | 10.853680000 | 18.500448785 | 9.080721785  |
| H | 11.577060000 | 19.295473785 | 8.838512000  |
| C | 10.724585571 | 18.052325785 | 10.404827785 |
| H | 11.350951571 | 18.489810571 | 11.198872785 |
| C | 9.809157571  | 17.041898785 | 10.742424356 |
| C | 9.667937142  | 16.514349571 | 12.145325356 |
| H | 9.954241712  | 15.438741356 | 12.207050142 |
| H | 10.305122142 | 17.083002356 | 12.852175356 |
| H | 8.613893142  | 16.567969785 | 12.497899142 |
| C | 4.437905000  | 13.429331785 | 10.039516785 |
| C | 2.610073215  | 15.139960215 | 9.507834215  |
| C | 1.665897215  | 15.393797215 | 10.546895215 |
| C | 1.858920000  | 14.791410785 | 11.909343000 |
| H | 2.769267785  | 15.193373785 | 12.408035429 |
| H | 0.993067785  | 15.003358571 | 12.569364785 |

|   |              |              |              |
|---|--------------|--------------|--------------|
| H | 2.000011215  | 13.689909785 | 11.855422785 |
| C | 0.565789644  | 16.211953644 | 10.244740429 |
| H | -0.176512356 | 16.409595644 | 11.036015429 |
| C | 0.393158858  | 16.763211073 | 8.964137429  |
| H | -0.482222927 | 17.398258502 | 8.750690644  |
| C | 1.339625858  | 16.507546073 | 7.959569429  |
| H | 1.211141073  | 16.943366502 | 6.955111644  |
| C | 2.462491429  | 15.703247644 | 8.206170215  |
| C | 3.487570429  | 15.407131429 | 7.147557215  |
| H | 3.292487644  | 15.986588858 | 6.221964429  |
| H | 4.517182429  | 15.639086000 | 7.502591215  |
| H | 3.487768000  | 14.329579644 | 6.875973000  |
| C | 2.317426000  | 11.248048215 | 10.617049785 |
| C | -0.250541000 | 11.199622215 | 10.557051142 |
| C | -0.941691000 | 10.414586215 | 11.521952142 |
| C | -0.181802000 | 9.660999644  | 12.579328571 |
| H | 0.540526215  | 8.935136644  | 12.144383000 |
| H | 0.425669785  | 10.349009073 | 13.208314356 |
| H | -0.870208000 | 9.101455858  | 13.243787571 |
| C | -2.345059000 | 10.384846571 | 11.448340498 |
| H | -2.900625000 | 9.781624571  | 12.185367498 |
| C | -3.035714785 | 11.109951356 | 10.466537283 |
| H | -4.136840785 | 11.070214712 | 10.428468854 |
| C | -2.330241785 | 11.883997571 | 9.533487498  |
| H | -2.875477785 | 12.455074356 | 8.763441283  |
| C | -0.926442785 | 11.949054000 | 9.554561927  |
| C | -0.153261785 | 12.782734429 | 8.571290356  |
| H | 0.372842356  | 13.623769858 | 9.076689571  |
| H | 0.629833858  | 12.183769858 | 8.058481785  |
| H | -0.823119571 | 13.218413000 | 7.801835927  |

**Table S4** The Cartesian coordinate of **3**.

|    |              |              |              |
|----|--------------|--------------|--------------|
| Pd | 0.159886000  | 1.672036000  | -0.025216000 |
| Pd | -0.163806000 | -1.097745000 | -0.233813000 |
| Pd | 0.617988000  | 0.103606000  | 2.313343000  |
| Pd | 2.504675000  | -0.125275000 | 0.161644000  |
| Pd | -0.614491000 | 0.830993000  | -2.540485000 |
| Pd | -2.584778000 | 0.254995000  | -0.495052000 |
| Ge | 1.738182000  | 0.253873000  | -2.115271000 |
| Ge | -1.777089000 | 0.218042000  | 1.842728000  |
| S  | 3.048842000  | -0.085835000 | 2.548109000  |
| S  | -3.093898000 | 0.878431000  | -2.848581000 |
| O  | 4.007848000  | -6.238039000 | 5.064590000  |
| O  | 5.716648000  | -6.126029000 | 3.705775000  |
| O  | -4.785502000 | 7.239405000  | -4.111537000 |
| O  | -4.826010000 | 7.295385000  | -1.925894000 |
| N  | 4.701617000  | -5.652144000 | 4.226294000  |
| N  | -4.687015000 | 6.704295000  | -3.003380000 |
| N  | -0.594564000 | 3.957370000  | -1.998629000 |
| N  | 1.673526000  | 3.348674000  | 2.149894000  |
| N  | 1.476876000  | -3.604809000 | 0.651608000  |
| N  | -2.508997000 | -2.707745000 | -1.517825000 |
| N  | -0.261498000 | -0.304922000 | 5.256108000  |
| N  | 5.361455000  | 0.125468000  | -1.025100000 |
| N  | -0.179828000 | -0.500278000 | -5.314454000 |
| N  | -5.332061000 | 0.301315000  | 0.951956000  |
| C  | 3.465582000  | -1.746103000 | 3.008583000  |
| C  | 2.750647000  | -2.449863000 | 4.008098000  |
| H  | 1.867779000  | -1.980726000 | 4.466562000  |
| C  | 3.157600000  | -3.722736000 | 4.411890000  |
| H  | 2.613869000  | -4.283700000 | 5.185550000  |
| C  | 4.283882000  | -4.309065000 | 3.812384000  |
| C  | 5.008555000  | -3.635954000 | 2.815212000  |
| H  | 5.880930000  | -4.130436000 | 2.365524000  |
| C  | 4.599037000  | -2.361519000 | 2.419342000  |
| H  | 5.156794000  | -1.817355000 | 1.640640000  |
| C  | -3.621284000 | 2.568805000  | -2.849555000 |

|   |              |              |              |
|---|--------------|--------------|--------------|
| C | -3.965085000 | 3.270509000  | -1.668139000 |
| H | -3.921423000 | 2.741560000  | -0.703965000 |
| C | -4.337766000 | 4.613889000  | -1.718553000 |
| H | -4.598021000 | 5.174459000  | -0.809274000 |
| C | -4.362781000 | 5.274911000  | -2.957978000 |
| C | -4.059042000 | 4.596603000  | -4.149494000 |
| H | -4.096785000 | 5.146764000  | -5.099833000 |
| C | -3.696156000 | 3.249538000  | -4.091429000 |
| H | -3.444579000 | 2.705508000  | -5.015841000 |
| C | 2.660063000  | 1.836737000  | -2.902010000 |
| C | 2.801774000  | 3.012648000  | -2.133721000 |
| H | 2.494979000  | 3.003356000  | -1.073660000 |
| C | 3.299065000  | 4.196277000  | -2.702125000 |
| H | 3.384288000  | 5.106963000  | -2.085561000 |
| C | 3.692148000  | 4.218803000  | -4.051896000 |
| H | 4.083769000  | 5.146389000  | -4.501274000 |
| C | 3.575915000  | 3.051593000  | -4.824992000 |
| H | 3.878710000  | 3.058721000  | -5.885856000 |
| C | 3.054214000  | 1.876311000  | -4.255248000 |
| H | 2.935187000  | 0.981658000  | -4.887491000 |
| C | 2.293998000  | -1.345022000 | -3.167889000 |
| C | 3.587383000  | -1.457373000 | -3.720210000 |
| H | 4.314257000  | -0.636845000 | -3.593827000 |
| C | 3.967363000  | -2.600234000 | -4.448349000 |
| H | 4.981315000  | -2.662856000 | -4.879132000 |
| C | 3.056591000  | -3.653478000 | -4.634731000 |
| H | 3.348008000  | -4.544179000 | -5.215455000 |
| C | 1.769629000  | -3.563229000 | -4.075754000 |
| H | 1.045668000  | -4.383451000 | -4.217503000 |
| C | 1.400778000  | -2.423142000 | -3.344634000 |
| H | 0.391294000  | -2.359660000 | -2.902321000 |
| C | -2.443823000 | 1.883441000  | 2.725363000  |
| C | -2.592618000 | 3.064459000  | 1.966577000  |
| H | -2.334976000 | 3.046762000  | 0.893297000  |
| C | -3.045056000 | 4.257293000  | 2.554136000  |
| H | -3.156668000 | 5.165876000  | 1.938890000  |

|   |              |              |              |
|---|--------------|--------------|--------------|
| C | -3.354344000 | 4.294733000  | 3.924573000  |
| H | -3.716076000 | 5.227974000  | 4.387120000  |
| C | -3.189616000 | 3.136327000  | 4.701466000  |
| H | -3.417256000 | 3.155171000  | 5.780857000  |
| C | -2.731922000 | 1.946435000  | 4.106716000  |
| H | -2.599861000 | 1.055117000  | 4.741750000  |
| C | -2.745242000 | -1.304824000 | 2.702945000  |
| C | -3.886120000 | -1.125816000 | 3.514531000  |
| H | -4.258757000 | -0.112404000 | 3.733069000  |
| C | -4.587551000 | -2.225735000 | 4.040353000  |
| H | -5.478548000 | -2.053748000 | 4.666942000  |
| C | -4.170064000 | -3.532866000 | 3.745519000  |
| H | -4.723214000 | -4.398151000 | 4.147087000  |
| C | -3.041646000 | -3.729778000 | 2.929940000  |
| H | -2.709807000 | -4.753828000 | 2.690323000  |
| C | -2.334859000 | -2.627131000 | 2.423093000  |
| H | -1.448333000 | -2.788307000 | 1.786053000  |
| C | -0.412163000 | 2.888399000  | -1.485862000 |
| C | -0.850498000 | 5.125580000  | -2.664147000 |
| C | -1.304800000 | 6.244439000  | -1.913597000 |
| C | -1.446363000 | 6.133061000  | -0.420699000 |
| H | -0.458712000 | 5.979898000  | 0.072405000  |
| H | -2.065113000 | 5.250726000  | -0.148990000 |
| H | -1.920516000 | 7.040919000  | 0.005683000  |
| C | -1.624972000 | 7.418181000  | -2.614409000 |
| H | -2.012394000 | 8.285378000  | -2.056211000 |
| C | -1.496436000 | 7.479997000  | -4.010041000 |
| H | -1.780301000 | 8.399800000  | -4.545130000 |
| C | -1.020367000 | 6.370549000  | -4.725990000 |
| H | -0.917487000 | 6.425468000  | -5.822449000 |
| C | -0.682979000 | 5.171991000  | -4.075441000 |
| C | -0.181833000 | 3.965264000  | -4.815859000 |
| H | -0.211362000 | 4.128470000  | -5.913303000 |
| H | -0.783933000 | 3.060749000  | -4.571121000 |
| H | 0.864748000  | 3.718500000  | -4.527883000 |
| C | 1.041960000  | 2.665085000  | 1.398810000  |

|   |              |              |              |
|---|--------------|--------------|--------------|
| C | 2.380843000  | 3.973351000  | 3.145124000  |
| C | 3.801094000  | 3.964255000  | 3.092438000  |
| C | 4.512760000  | 3.288297000  | 1.952732000  |
| H | 5.603802000  | 3.489622000  | 1.988892000  |
| H | 4.121739000  | 3.626972000  | 0.967127000  |
| H | 4.360352000  | 2.183773000  | 1.985730000  |
| C | 4.490677000  | 4.589534000  | 4.145269000  |
| H | 5.593155000  | 4.593094000  | 4.128764000  |
| C | 3.801905000  | 5.197667000  | 5.205844000  |
| H | 4.364985000  | 5.677640000  | 6.022676000  |
| C | 2.398304000  | 5.201775000  | 5.226283000  |
| H | 1.857848000  | 5.687480000  | 6.055820000  |
| C | 1.656943000  | 4.598565000  | 4.196945000  |
| C | 0.154111000  | 4.608141000  | 4.166003000  |
| H | -0.267651000 | 5.041807000  | 5.095717000  |
| H | -0.265234000 | 3.586504000  | 4.033064000  |
| H | -0.228455000 | 5.201999000  | 3.304823000  |
| C | -1.829414000 | -1.841716000 | -1.029662000 |
| C | -3.137648000 | -3.808895000 | -2.036573000 |
| C | -4.414902000 | -3.655270000 | -2.642624000 |
| C | -5.057515000 | -2.298073000 | -2.714067000 |
| H | -4.520294000 | -1.628079000 | -3.423385000 |
| H | -5.016179000 | -1.773524000 | -1.735894000 |
| H | -6.115780000 | -2.370754000 | -3.040613000 |
| C | -5.022144000 | -4.802446000 | -3.181992000 |
| H | -6.013793000 | -4.706920000 | -3.654690000 |
| C | -4.388390000 | -6.053289000 | -3.125150000 |
| H | -4.883081000 | -6.939602000 | -3.554769000 |
| C | -3.128776000 | -6.181118000 | -2.518958000 |
| H | -2.634480000 | -7.165681000 | -2.472755000 |
| C | -2.478026000 | -5.068353000 | -1.961016000 |
| C | -1.129165000 | -5.170215000 | -1.302147000 |
| H | -1.169590000 | -4.826325000 | -0.244297000 |
| H | -0.377722000 | -4.515142000 | -1.797879000 |
| H | -0.749104000 | -6.212367000 | -1.316843000 |
| C | 0.958063000  | -2.587800000 | 0.302336000  |



|   |              |              |              |
|---|--------------|--------------|--------------|
| C | 2.130323000  | -4.764921000 | 0.982418000  |
| C | 1.620623000  | -5.570822000 | 2.034409000  |
| C | 0.373149000  | -5.154993000 | 2.762660000  |
| H | 0.449673000  | -4.111260000 | 3.140903000  |
| H | 0.164701000  | -5.826631000 | 3.621009000  |
| H | -0.509720000 | -5.177443000 | 2.084041000  |
| C | 2.321170000  | -6.745927000 | 2.354105000  |
| H | 1.959911000  | -7.373955000 | 3.183923000  |
| C | 3.483071000  | -7.107320000 | 1.655918000  |
| H | 4.034292000  | -8.016312000 | 1.942855000  |
| C | 3.963102000  | -6.295097000 | 0.617267000  |
| H | 4.883424000  | -6.575554000 | 0.079071000  |
| C | 3.300548000  | -5.111074000 | 0.255298000  |
| C | 3.787404000  | -4.212383000 | -0.844383000 |
| H | 3.909715000  | -3.166112000 | -0.483940000 |
| H | 3.061008000  | -4.156711000 | -1.686821000 |
| H | 4.756918000  | -4.567804000 | -1.248616000 |
| C | 0.051021000  | -0.177562000 | 4.112872000  |
| C | -0.638555000 | -0.399810000 | 6.573741000  |
| C | -0.492521000 | 0.743241000  | 7.406254000  |
| C | 0.062301000  | 2.023771000  | 6.844145000  |
| H | 1.043983000  | 1.864356000  | 6.343665000  |
| H | 0.196582000  | 2.785470000  | 7.639776000  |
| H | -0.615406000 | 2.447733000  | 6.069118000  |
| C | -0.893695000 | 0.619669000  | 8.747260000  |
| H | -0.790553000 | 1.490562000  | 9.415410000  |
| C | -1.414361000 | -0.587035000 | 9.239203000  |
| H | -1.721673000 | -0.661317000 | 10.294985000 |
| C | -1.540941000 | -1.701158000 | 8.395453000  |
| H | -1.945996000 | -2.648600000 | 8.787360000  |
| C | -1.155601000 | -1.636232000 | 7.045956000  |
| C | -1.277202000 | -2.809119000 | 6.112601000  |
| H | -0.291327000 | -3.082732000 | 5.671241000  |
| H | -1.949285000 | -2.579082000 | 5.256438000  |
| H | -1.679499000 | -3.699085000 | 6.638630000  |
| C | 4.256377000  | 0.033267000  | -0.585584000 |

|   |              |              |              |
|---|--------------|--------------|--------------|
| C | 6.620701000  | 0.199057000  | -1.576870000 |
| C | 7.311350000  | -1.010162000 | -1.864395000 |
| C | 6.669636000  | -2.335877000 | -1.566072000 |
| H | 6.395919000  | -2.423990000 | -0.490497000 |
| H | 7.348366000  | -3.176300000 | -1.819829000 |
| H | 5.724485000  | -2.463218000 | -2.139879000 |
| C | 8.590965000  | -0.910586000 | -2.435620000 |
| H | 9.142945000  | -1.836605000 | -2.666351000 |
| C | 9.166167000  | 0.339257000  | -2.708802000 |
| H | 10.171807000 | 0.395431000  | -3.156123000 |
| C | 8.466206000  | 1.517561000  | -2.410922000 |
| H | 8.920337000  | 2.499272000  | -2.623805000 |
| C | 7.182763000  | 1.477791000  | -1.839806000 |
| C | 6.410181000  | 2.726097000  | -1.522789000 |
| H | 6.082954000  | 2.743424000  | -0.459218000 |
| H | 5.482370000  | 2.793600000  | -2.132993000 |
| H | 7.018225000  | 3.633326000  | -1.718086000 |
| C | -0.306666000 | 0.120467000  | -4.303009000 |
| C | -0.191284000 | -1.484141000 | -6.278107000 |
| C | -1.263702000 | -2.418442000 | -6.260184000 |
| C | -2.351788000 | -2.299665000 | -5.230942000 |
| H | -2.872299000 | -1.317363000 | -5.296380000 |
| H | -1.938245000 | -2.351533000 | -4.198831000 |
| H | -3.101540000 | -3.109691000 | -5.340154000 |
| C | -1.245566000 | -3.446089000 | -7.217798000 |
| H | -2.064318000 | -4.184392000 | -7.219135000 |
| C | -0.208391000 | -3.540071000 | -8.158200000 |
| H | -0.214323000 | -4.352648000 | -8.902812000 |
| C | 0.836574000  | -2.604291000 | -8.153242000 |
| H | 1.652842000  | -2.683691000 | -8.890068000 |
| C | 0.871137000  | -1.559210000 | -7.214565000 |
| C | 2.011640000  | -0.580892000 | -7.154492000 |
| H | 2.663407000  | -0.806230000 | -6.279210000 |
| H | 1.652715000  | 0.464277000  | -7.030911000 |
| H | 2.635709000  | -0.637125000 | -8.070538000 |
| C | -4.292994000 | 0.399364000  | 0.376921000  |

|   |              |              |              |
|---|--------------|--------------|--------------|
| C | -6.455108000 | 0.080944000  | 1.712802000  |
| C | -6.987544000 | -1.235377000 | 1.775251000  |
| C | -6.352580000 | -2.351748000 | 0.993000000  |
| H | -6.805143000 | -3.329752000 | 1.255732000  |
| H | -5.258387000 | -2.412273000 | 1.186502000  |
| H | -6.480349000 | -2.196701000 | -0.101999000 |
| C | -8.110680000 | -1.437385000 | 2.594931000  |
| H | -8.540439000 | -2.450225000 | 2.665570000  |
| C | -8.680795000 | -0.378782000 | 3.318583000  |
| H | -9.561826000 | -0.561238000 | 3.955169000  |
| C | -8.133758000 | 0.910851000  | 3.236461000  |
| H | -8.582979000 | 1.740030000  | 3.807467000  |
| C | -7.010055000 | 1.171458000  | 2.434101000  |
| C | -6.379598000 | 2.534094000  | 2.344787000  |
| H | -6.281686000 | 2.869452000  | 1.287761000  |
| H | -5.349438000 | 2.531898000  | 2.767418000  |
| H | -6.976109000 | 3.288667000  | 2.897533000  |

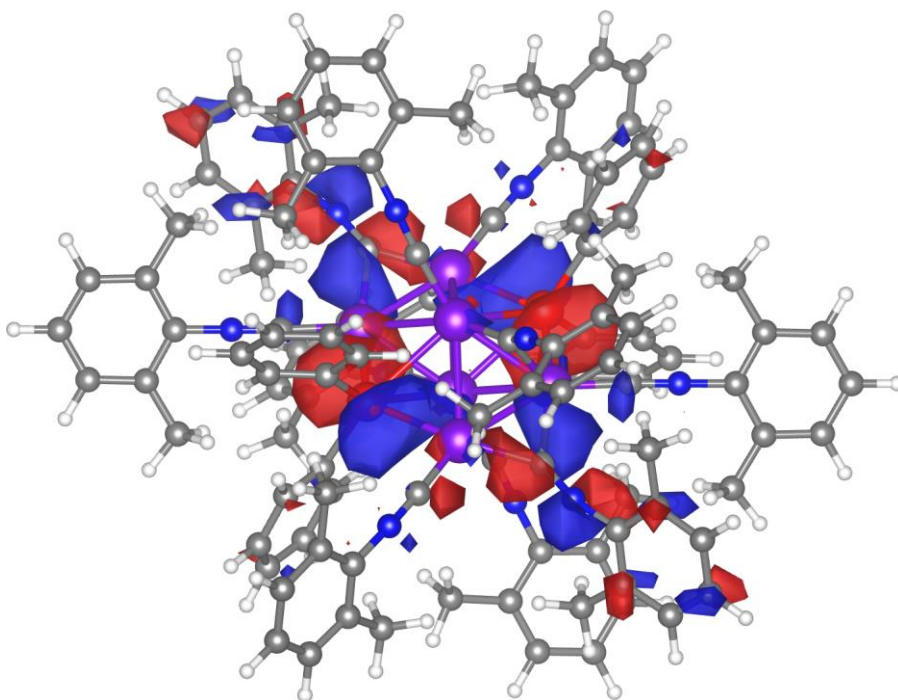

**Figure S8.** LUMO of complex 2.

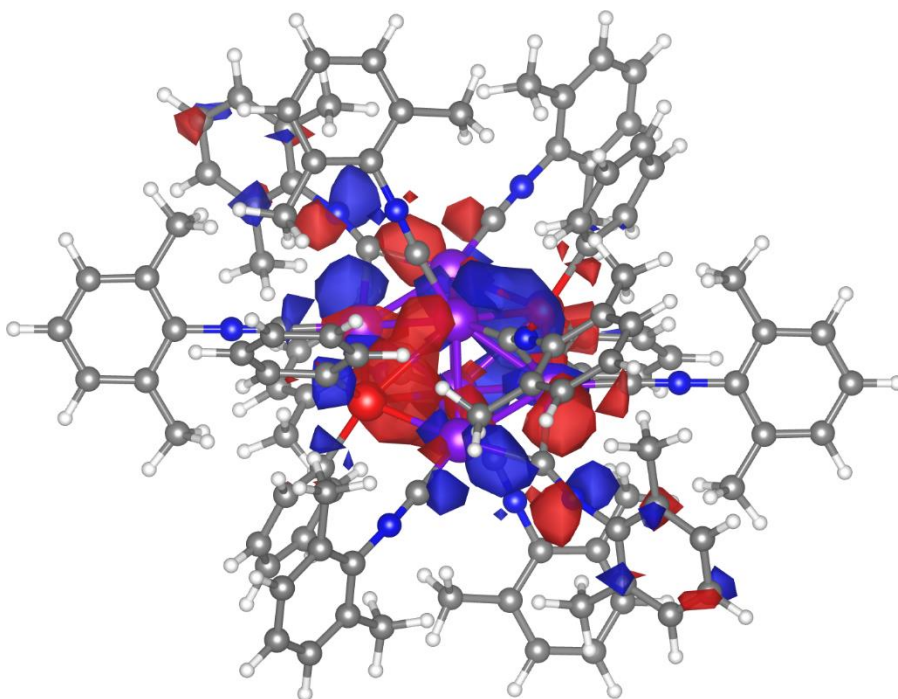

**Figure S9.** Expanded HOMO of complex 2.

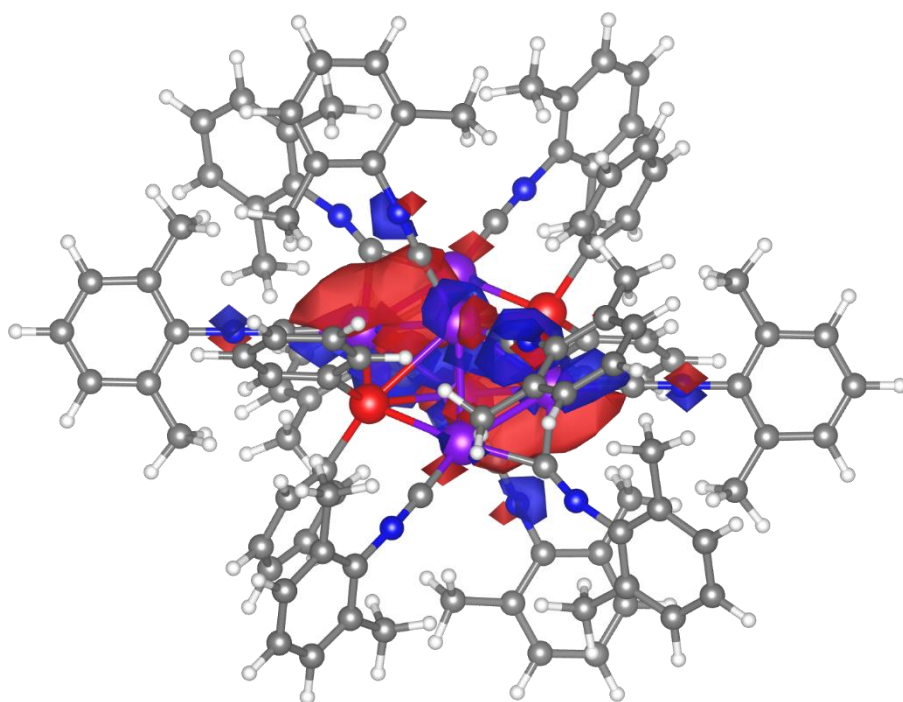

**Figure S10.** HOMO-1 of complex 2.

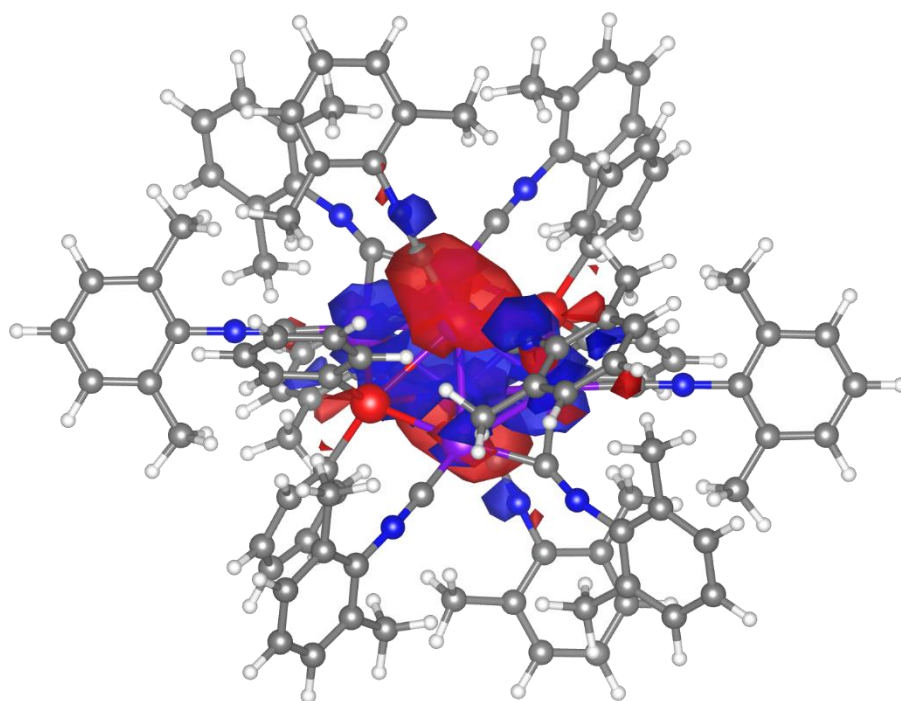

**Figure S11.** HOMO-2 of complex 2.

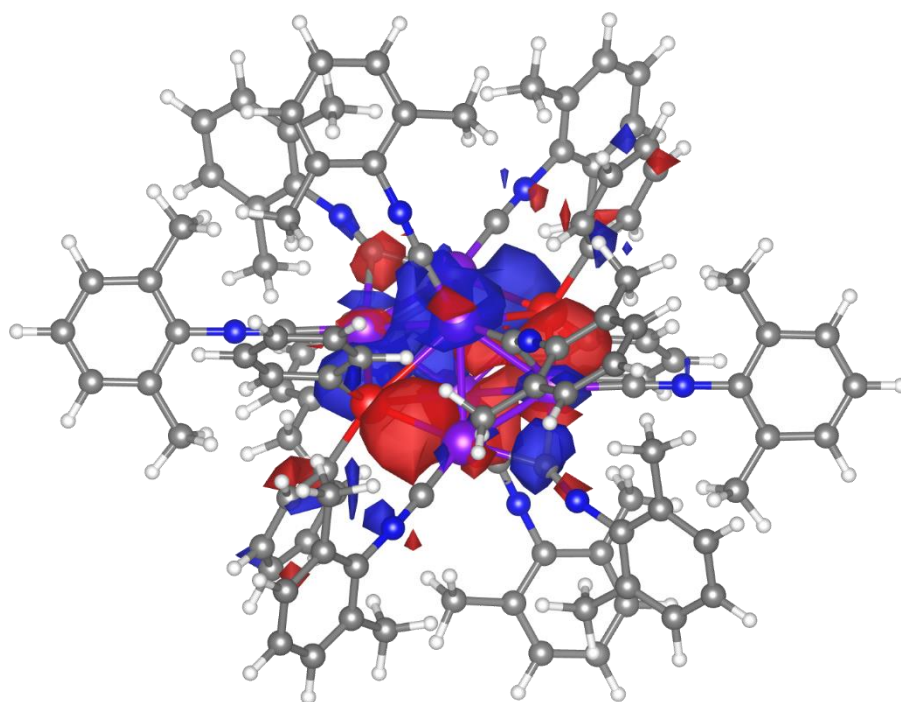

**Figure S12.** HOMO-3 of complex 2.

Natural Charge

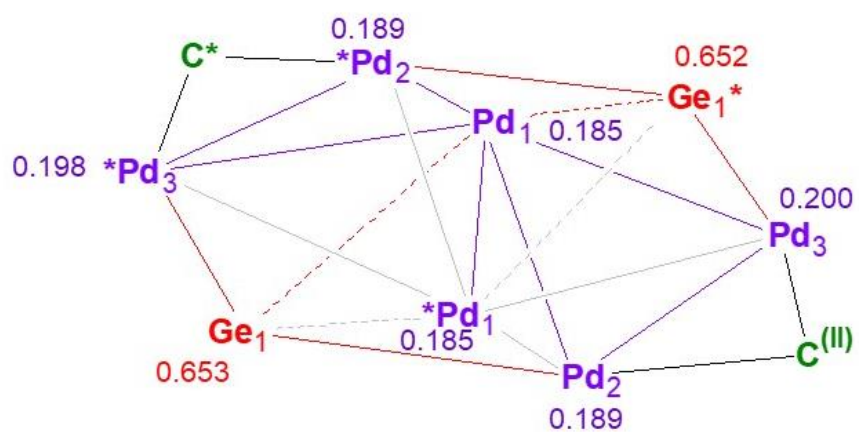

$\omega$ B97X-D3/def2-TZVP//PBE-D3/def2-SV(P)

**Figure S13.** Natural charge of complex 2.

## Wiberg Bond Index

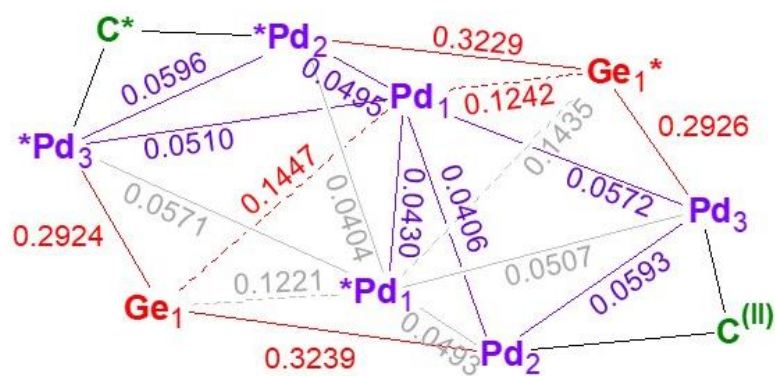

$\omega$ B97X-D3/def2-TZVP//PBE-D3/def2-SV(P)

**Figure S14.** Wiberg bond index of complex 2.

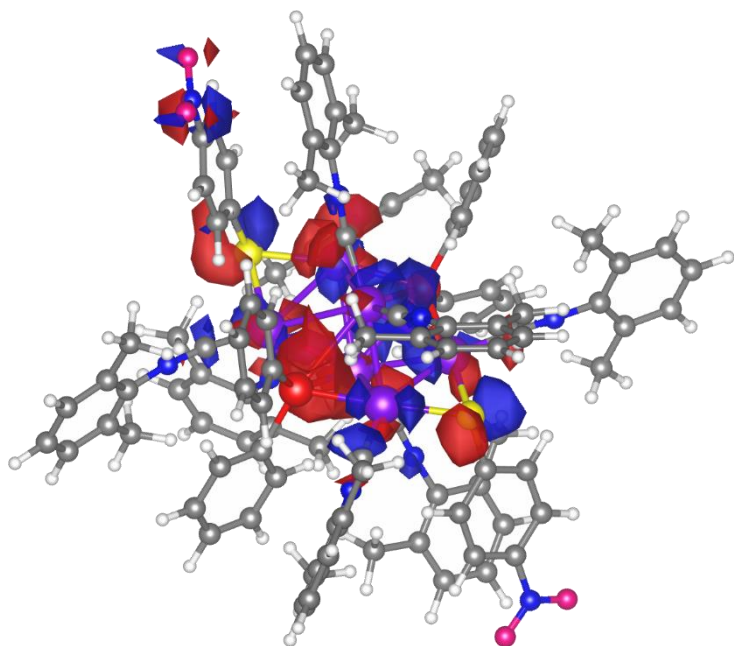

**Figure S15.** LUMO of complex **3**.

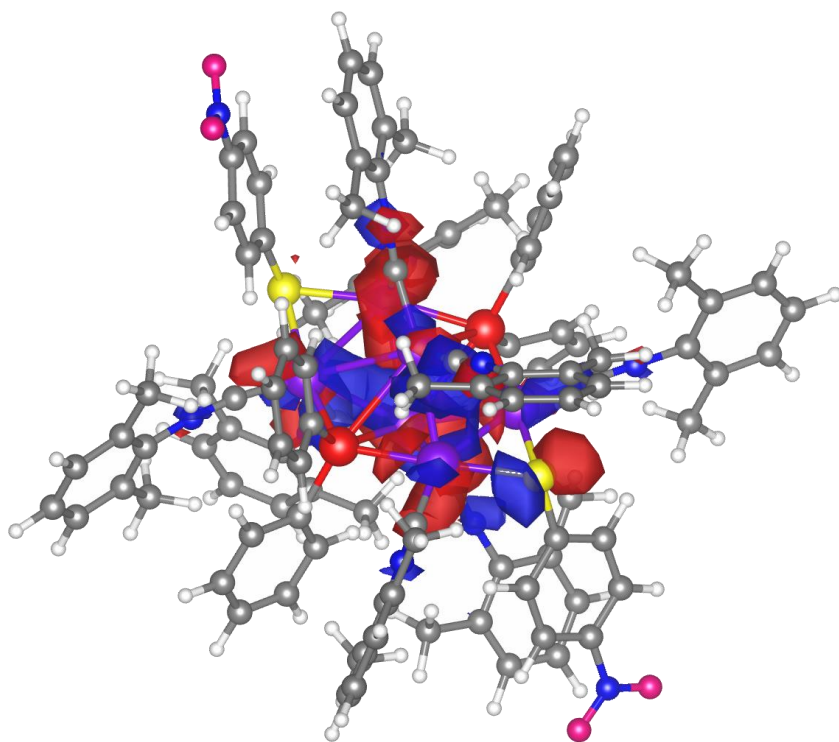

**Figure S16.** HOMO of complex **3**.



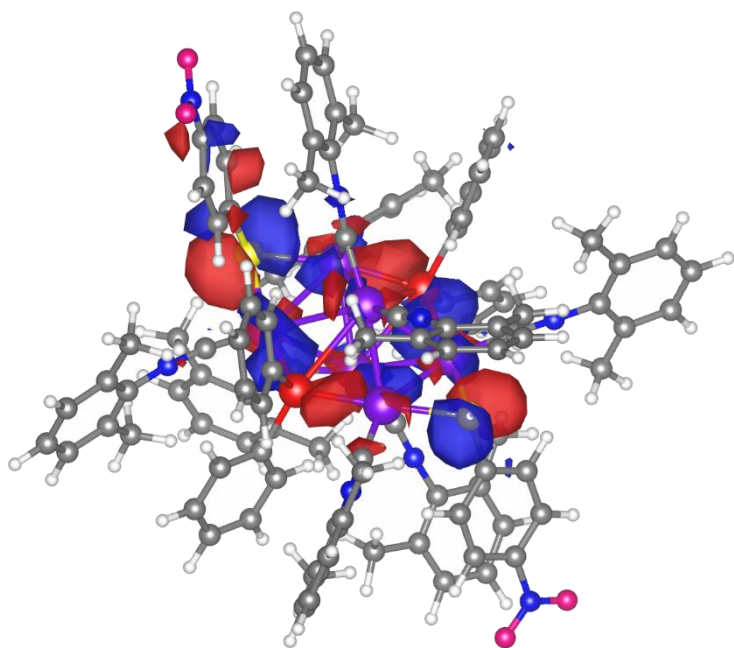

**Figure S17.** HOMO-1 of complex 3.

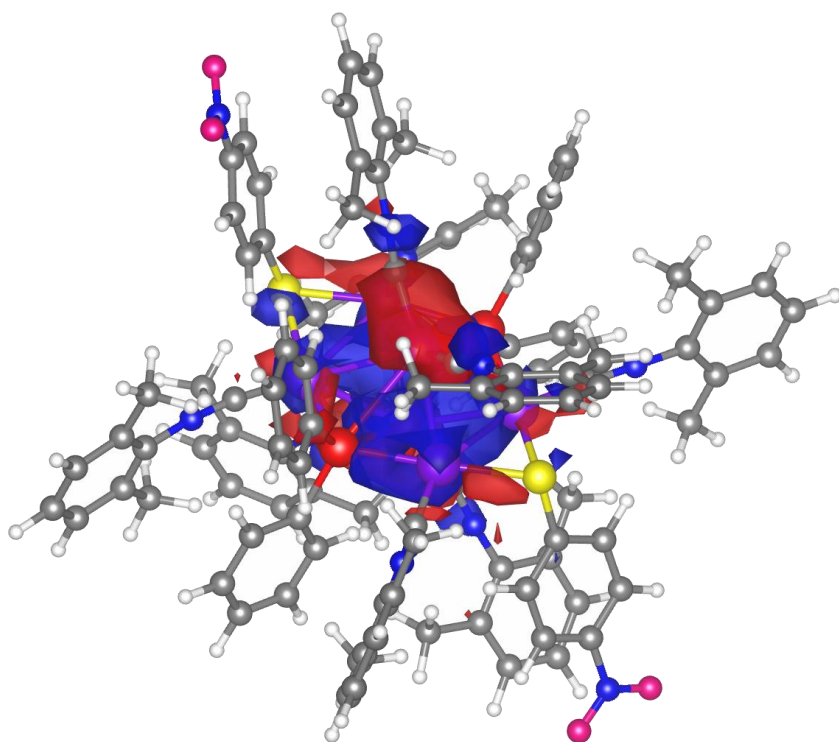

**Figure S18.** HOMO-2 of complex 3.

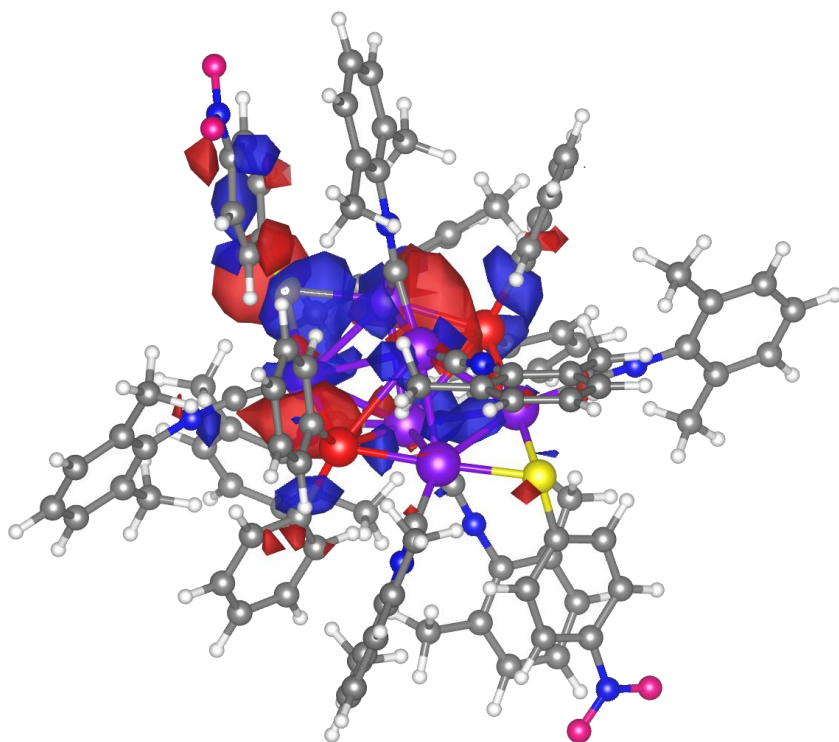

**Figure S19.** HOMO-3 of complex **3**.

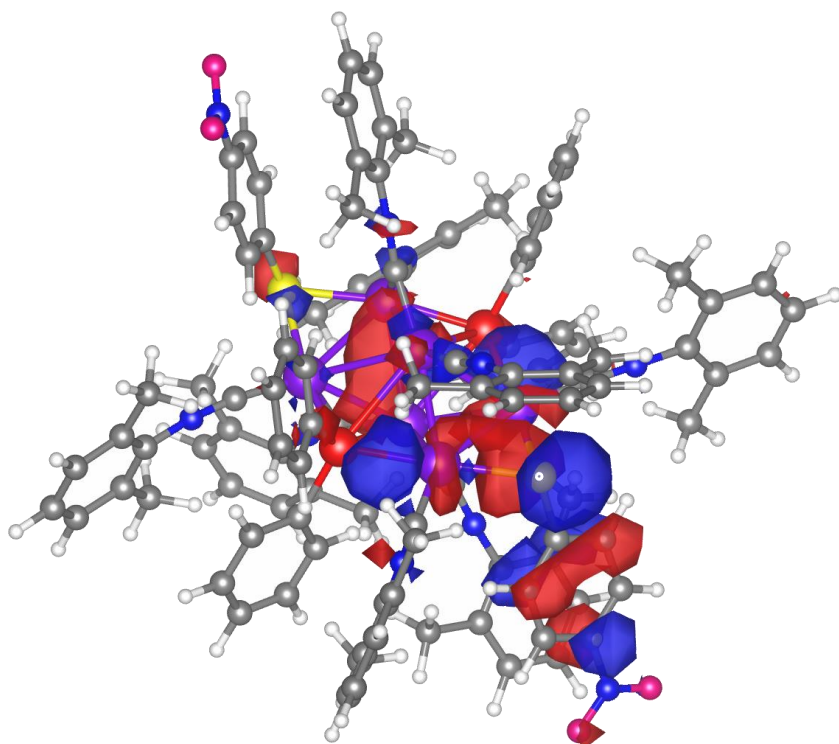

**Figure S20.** HOMO-4 of complex **3**.

## Natural Charge

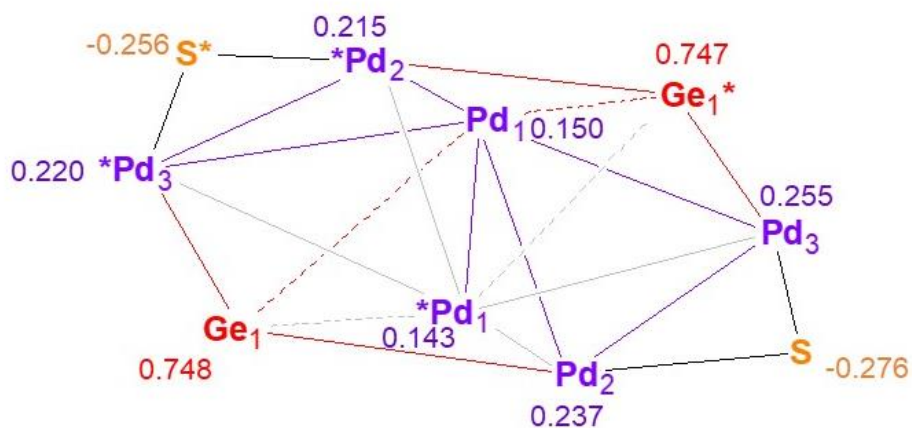

$\omega$ B97X-D3/def2-TZVP//PBE-D3/def2-SV(P)  
NBO 7.0

**Figure S21.** Natural charge of complex 3.

## Wiberg Bond Index

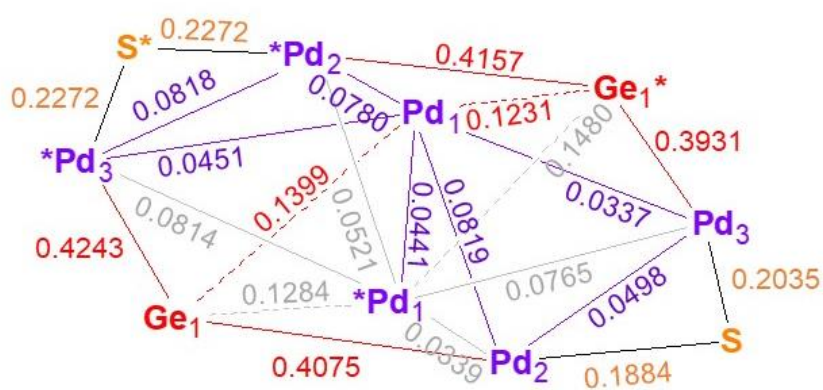

$\omega$ B97X-D3/def2-TZVP//PBE-D3/def2-SV(P)  
NBO 7.0

**Figure S22.** Wiberg bond index of complex 3.

## 5. DFT calculation results and absorption spectra

Time-dependent DFT (TDDFT) calculation with Tamm-Dancoff approximation (TDA) was carried out by ORCA 4.1.0 at the B3LYP/def2-SVP level of theory. The RIJCOSX approximation was applied for the calculation in combination with the def2-SVP/C auxiliary basis set.

### Complex 2

| State | Wavelength<br>(nm) | Oscillator strength<br>( $\text{au}^2$ ) | Electronic transitions (ratio)                                                                        |
|-------|--------------------|------------------------------------------|-------------------------------------------------------------------------------------------------------|
| 1     | 781.9              | 0.000024                                 | HOMO-1 $\rightarrow$ LUMO (99%)                                                                       |
| 2     | 717.7              | 0.18                                     | HOMO-1 $\rightarrow$ LUMO+1 (16%)<br>HOMO $\rightarrow$ LUMO (80%)                                    |
| 3     | 672.7              | 0.000040                                 | HOMO $\rightarrow$ LUMO+1 (98%)                                                                       |
| 4     | 583.2              | 0.000072                                 | HOMO-2 $\rightarrow$ LUMO (98%)                                                                       |
| 5     | 572.8              | 0.56                                     | HOMO-1 $\rightarrow$ LUMO+1 (70%)<br>HOMO $\rightarrow$ LUMO (11%)<br>HOMO $\rightarrow$ LUMO+2 (10%) |
| 6     | 545.1              | 0.11                                     | HOMO-1 $\rightarrow$ LUMO+1 (7%)<br>HOMO $\rightarrow$ LUMO+2 (76%)                                   |

**Complex 3**

| State | Wavelength<br>(nm) | Oscillator strength<br>( $\text{au}^2$ ) | Electronic transitions (ratio)                                                                                                           |
|-------|--------------------|------------------------------------------|------------------------------------------------------------------------------------------------------------------------------------------|
| 1     | 736.0              | 0.00097                                  | HOMO $\rightarrow$ LUMO (89%)<br>HOMO $\rightarrow$ LUMO+2 (6%)                                                                          |
| 2     | 646.4              | 0.013                                    | HOMO-2 $\rightarrow$ LUMO (35%)<br>HOMO-1 $\rightarrow$ LUMO (52%)                                                                       |
| 3     | 594.9              | 0.0011                                   | HOMO $\rightarrow$ LUMO+1 (95%)                                                                                                          |
| 4     | 559.6              | 0.011                                    | HOMO-2 $\rightarrow$ LUMO (5%)<br>HOMO $\rightarrow$ LUMO (6%)<br>HOMO $\rightarrow$ LUMO+2 (74%)                                        |
| 5     | 557.5              | 0.21                                     | HOMO-2 $\rightarrow$ LUMO (43%)<br>HOMO-1 $\rightarrow$ LUMO (31%)<br>HOMO $\rightarrow$ LUMO+2 (11%)                                    |
| 6     | 540.5              | 0.0068                                   | HOMO-3 $\rightarrow$ LUMO (64%)<br>HOMO-3 $\rightarrow$ LUMO+2 (5%)<br>HOMO $\rightarrow$ LUMO+2 (5%)<br>HOMO $\rightarrow$ LUMO+3 (15%) |

Absorbance at 646 nm is assigned to the second excited state.

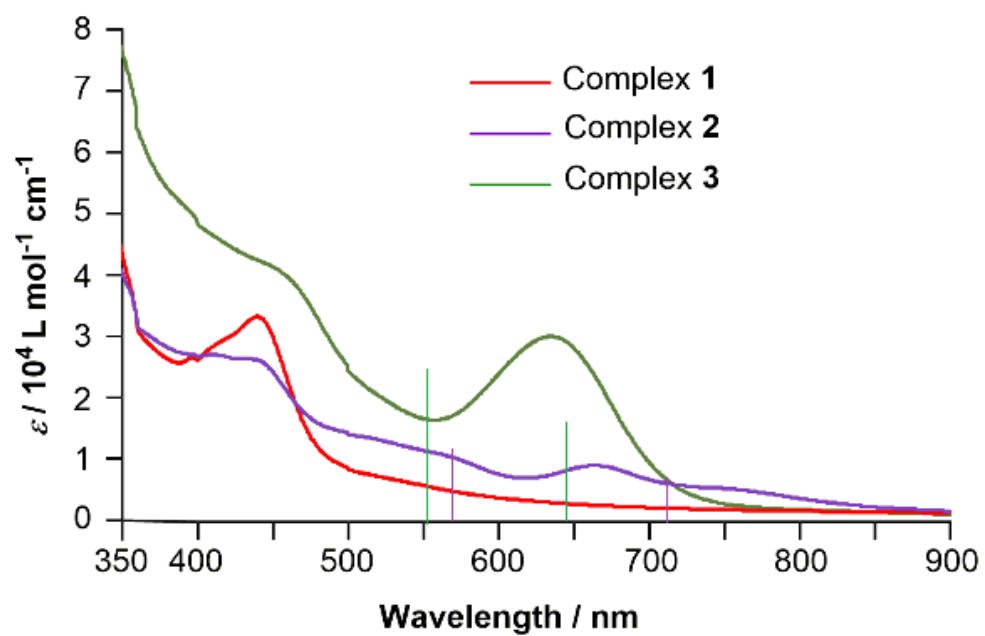

**Figure S23.** UV-vis spectra and calculated peak positions.
